# Supplementary material for: What factors are critical to attracting NHS foundation doctors into specialty or core training? A discrete choice experiment
Source: PubMed Central journal article supplement — BMJ Open. 2018 Mar 12;8(3):e019911. doi: 10.1136/bmjopen-2017-019911 (PMC5857684; doi:10.1136/bmjopen-2017-019911), 2018-03-12
Supplement: bmjopen-2017-019911.draft_revisions.pdf [file bmjopen-2017-019911.draft_revisions.pdf]

# BMJ Open

BMJ Open is committed to open peer review. As part of this commitment we make the peer review history of every article we publish publicly available.

When an article is published we post the peer reviewers' comments and the authors' responses online. We also post the versions of the paper that were used during peer review. These are the versions that the peer review comments apply to.

The versions of the paper that follow are the versions that were submitted during the peer review process. They are not the versions of record or the final published versions. They should not be cited or distributed as the published version of this manuscript.

BMJ Open is an open access journal and the full, final, typeset and author-corrected version of record of the manuscript is available on our site with no access controls, subscription charges or pay-per-view fees (<http://bmjopen.bmj.com>).

If you have any questions on BMJ Open's open peer review process please email [info.bmjopen@bmj.com](mailto:info.bmjopen@bmj.com)

# BMJ Open

## Location and Support are Critical to Attracting Foundation Doctors: A Discrete Choice Experiment

|                                 |                                                                                                                                                                                                                                                                                                                                    |
|---------------------------------|------------------------------------------------------------------------------------------------------------------------------------------------------------------------------------------------------------------------------------------------------------------------------------------------------------------------------------|
| Journal:                        | <i>BMJ Open</i>                                                                                                                                                                                                                                                                                                                    |
| Manuscript ID                   | bmjopen-2017-019911                                                                                                                                                                                                                                                                                                                |
| Article Type:                   | Research                                                                                                                                                                                                                                                                                                                           |
| Date Submitted by the Author:   | 03-Oct-2017                                                                                                                                                                                                                                                                                                                        |
| Complete List of Authors:       | Scanlan, Gillian; Aberdeen University; NA, Cleland, Jennifer; University of Aberdeen<br>Johnston, Peter; NHS Education for Scotland, North Deanery<br>Walker, Kim; NHS Education for Scotland., NHS Education for Scotland and UK Foundation Programme<br>Krucien, Nicolas; Univ Aberdeen<br>Skatun, Diane; University of Aberdeen |
| <b>Primary Subject Heading</b>: | Medical education and training                                                                                                                                                                                                                                                                                                     |
| Secondary Subject Heading:      | Health economics                                                                                                                                                                                                                                                                                                                   |
| Keywords:                       | EDUCATION & TRAINING (see Medical Education & Training), HEALTH ECONOMICS, MEDICAL EDUCATION & TRAINING                                                                                                                                                                                                                            |
|                                 |                                                                                                                                                                                                                                                                                                                                    |

SCHOLARONE™  
Manuscripts

Peer Review Only

1  
2  
3 **Location and Support are Critical to Attracting Foundation Doctors: A Discrete Choice Experiment**  
4  
5

6  
7 **Gillian Scanlan<sup>1</sup>, Jennifer Cleland<sup>2</sup>, Peter Johnston<sup>3</sup>, Kim Walker<sup>4</sup>, Nicolas Krucien<sup>5</sup>, Diane Skåtun<sup>5</sup>**  
8  
9

10  
11 <sup>1</sup> PhD candidate, Centre for Healthcare Education Research and Innovation (CHERI), Institute of  
12  
13 Education for Medical and Dental Sciences, School of Medicine, Dentistry and Nutrition, University of  
14  
15 Aberdeen, Aberdeen, Foresterhill, AB25 2ZD  
16

17 <sup>2</sup> John Simpson Chair of Medical Education, Centre for Healthcare Education Research and  
18  
19 Innovation (CHERI), Institute of Education for Medical and Dental Sciences, School of Medicine,  
20  
21 Dentistry and Nutrition, University of Aberdeen, Aberdeen, Foresterhill, AB25 2ZD  
22

23 <sup>3</sup> Depute Postgraduate Dean, NHS Education for Scotland, Scotland Deanery (North),  
24  
25

26 <sup>4</sup>Scotland Foundation School Director, NHS Education for Scotland, Foresterhill, Aberdeen, AB25 2ZP  
27

28 <sup>5</sup> Research Fellow and Senior Research Fellow respectively, Health Economics Research Unit (HERU),  
29  
30 School of Medicine and Dentistry, University of Aberdeen, Foresterhill, Aberdeen, AB25 2ZD  
31  
32

33  
34 **Correspondence to:** Ms Gillian Scanlan  
35

36 Email: r01gms15@abdn.ac.uk  
37  
38  
39  
40  
41  
42  
43  
44  
45  
46  
47  
48  
49  
50  
51  
52  
53  
54  
55  
56  
57  
58  
59  
60

**Abstract**

**Objectives:** Multiple personal and work-related factors influence medical trainee careers decision making. The relative value of these diverse factors is under-researched, yet this intelligence is crucially important for informing medical workforce planning, and retention and recruitment policies. Our aim was to investigate the relative value of UK doctors' preferences for different training post characteristics during the time period when they either apply for speciality or core medical training, or take time out.

**Methods:** We developed a discrete choice experiment (DCE) specifically for this population. The DCE was distributed to all second year Foundation Programme doctors (F2s) across Scotland as part of a larger online survey in June 2016. The main outcome measure was the monetary value of training-post characteristics, based on willingness to forgo additional annual income and willingness to accept extra income for a change in each job characteristic calculated from regression coefficients.

**Results:** 677/798 F2 doctors provided usable DCE responses. Location was the most influential characteristic of a training position, followed closely by supportive culture and then working conditions. F2 doctors would need to be compensated by an additional 45.75% above potential earnings to move from a post in a desirable location to one in an undesirable location. Doctors who applied for a training post placed less value on supportive culture and excellent working conditions than those who did not apply. Male F2s valued Location and a supportive culture less than their female counterparts.

**Conclusion:** This is the first study focusing on the career decision making of UK doctors at a critical careers decision-making point. Both location and specific job-related attributes are highly valued by F2 doctors when deciding their future. This intelligence can inform workforce policy to focus their efforts in terms of making training posts attractive to this group of doctors to enhance recruitment and retention.

*Word count – 300*

### **Strengths and Limitations of this Study**

- An important strength of this study is that it surveyed all Foundation Programme year two doctors in Scotland: that is, those at a critical point in medical careers decision making (i.e. the time of committing to specific speciality or core training programmes).
- Survey responses were received from 84.8% of the eligible population of Foundation Year Two Doctors in Scotland (n=798).
- Our sample was diverse and representative of the UK population of F2 doctors in terms of: gender, graduate application rates and those who applied vs did not apply for training.
- Our Focus was on generic 'push-pull' factors rather than speciality choice (i.e. surgery or general practice), thus we could not investigate possible links between the training choice preference selected and the speciality or core training programme the F2 had chosen.

## **Introduction**

Accurately predicting medical workforce supply is increasingly challenging. Doctors no longer behave in time-recognised ways in terms of career decision making, and their behaviour no longer fits with service need<sup>1</sup>. For example, in the UK context, medical graduates are choosing not to progress through training as predicted. In 2016, nearly 50% of those graduates completing the Foundation Programme (the generic two-year training programme which bridges the gap between medical school and being eligible to apply for core, specialty or general practice) did not apply for core medical training or Specialty training (including General Practice) at the standard point in time<sup>2,3</sup>. Simply put, one in two of today's medical graduates left the training pipeline at the first natural break opportunity while keeping their options open (i.e. with full registration and eligibility to apply for higher training). Instead, they opted to take a break from training, often working overseas for a period of time<sup>4</sup>. Although working overseas has always been a popular option<sup>5</sup>, the difference nowadays is that at least one in twenty Foundation Programme (FP) doctors appear to leave the UK workforce for good<sup>6</sup>. Given this "brain drain", more understanding of what is important to the careers decision making of doctors as they enter their post-FP phase is crucial in order to identify how best to enhance the attractiveness of medical training, and thus ensure sufficient doctors to deliver service now and in the future<sup>7</sup>.

There is a wide literature examining the factors influencing medical student, trainee doctor and qualified healthcare professional workplace supply and career decision making factors. This literature highlights the influence of socio-demographic factors such as gender<sup>8-10</sup> and the importance of financial incentives<sup>11-14</sup>, professional and educational development<sup>14,15</sup>, geographical location<sup>11,16,17</sup>, work-life balance<sup>18,19</sup>, quality of life<sup>20,21</sup>, flexibility<sup>18,21,22</sup>, working conditions<sup>17,20,23,24</sup> and prior education<sup>25</sup> in medical careers decision making. Recent studies have provided some insight into Foundation doctors' preferences specifically. This research suggests that job-related factors, such as the level of support and satisfaction throughout the Foundation Programme impact on FP

1  
2  
3 doctor career decision making<sup>26,27,28</sup>. This information is important as it was previously assumed  
4 that medical careers preferences and values were formed prior to leaving medical school<sup>20,21,29</sup>. If  
5 this is not the case, it is crucial to identify the key attributes that play a crucial role in making training  
6 posts more attractive to those in the early stages of postgraduate training, as this intelligence may  
7 be used to inform interventions aimed at increasing the number of doctors staying in the training  
8 pipeline.  
9  
10  
11  
12  
13  
14  
15

16  
17 Senior doctors, medical trainee and senior student preferences for job characteristics<sup>17,30,31</sup> have  
18 progressed from relying on simple surveys<sup>32,33</sup> to using discrete choice experiments (DCEs) to identify  
19 the relative importance medical students and trainees place on different characteristics<sup>17,30</sup>.  
20  
21 However, to date, this approach has not been used specifically with F2 doctors although this is a  
22 group whose career-related decisions are crucial to the present and future delivery of care. Indeed,  
23 very little is known about the critical factors in F2 career decision making. The original UK DCE work  
24 of Cleland and colleagues did not allow for the identification of the most important attributes that  
25 are critical for Foundation year two (F2) doctors, while DCEs with junior doctors in other contexts  
26 have narrowly focussed upon particular careers preferences<sup>17,34-36-34</sup>.  
27  
28  
29  
30  
31  
32  
33  
34  
35  
36  
37

38 Thus, to address this gap in the literature, we developed a new DCE (see later) to assess the  
39 importance of different factors that make training posts more, or less, attractive to FY2 Doctors. Our  
40 ultimate aim in doing so was to gather intelligence to inform how best to address tensions between  
41 the job preferences of F2 doctors and healthcare need.  
42  
43  
44  
45  
46  
47  
48  
49  
50  
51  
52  
53  
54  
55  
56  
57  
58  
59  
60

## **Methods**

This study used a quantitative technique, known as a DCE, to elicit training post preferences<sup>17,37</sup>. This technique presents respondents with a series of choices to be made between hypothetical training posts. Each post is presented as a bundle of key characteristics (such as geographical location, culture of working and learning environment, etc) where each bundle presents alternative levels of these characteristics (desirable or undesirable location, etc, see table 1). By selecting one hypothetical training post over another, respondents indicate their willingness to trade off these characteristics and in doing so the relative importance of the characteristics can be measured+. Thus, the DCE approach can measure how willing an individual is to substitute one attribute for another<sup>31</sup> (e.g. being very familiar with a speciality over poorer working conditions). These trade-offs can be converted into willingness-to-pay (WTP) values when a monetary attribute is included in the DCE<sup>37, 38</sup>.

## **Context**

In the UK, medical students spend between 4-6 years at medical school. On graduation, over 98% of medical students apply for the Foundation Programme (FP). This is a generic two-year training programme which bridges the gap between medical school and specialty training. FP doctors mostly undertake six four-month rotations, with regular assessments and milestones. At the end of the F1 year, trainees obtain full registration with the regulator (GMC). Satisfactory completion of F2 makes them eligible to apply for further specialty specific training including core and general practice. In November of their second year, during their fourth rotation, F2 doctors can apply for the next stage of their postgraduate training through a national recruitment and selection process. The specialty training programmes recognised by the General Medical Council (GMC) last between 3 – 8 years and at the end of training, doctors are awarded the certificate of completion of training (CCT) which allows them to work as a consultant or GP in that specialty.



### Development of the discrete choice experiment (DCE)

Following guidelines<sup>39</sup> we used qualitative methods to ensure that the characteristics and levels presented within the hypothetical training posts were clear, sensible, and meaningful to the respondents. We first consulted the international literature on medical labour markets and careers decision making to identify which attributes might be relevant. However, as little of the literature was drawn from our target population of post-registration, pre-specialty training doctors were needed to bridge this evidence gap to refine the content and choice of attributes. To find out more about what was important to this group, we carried out two focus groups and 21 individual interviews with Foundation Doctors drawn from two contrasting Scottish regions between December 2015 and April 2016. Using a semi-structured interview schedule, we gathered data about the key characteristics considered when applying for training posts.

This two-stage methodology identified five characteristics of training positions that were likely to be major drivers of Foundation Year 2 (F2) doctors in their medical careers decision-making behaviour and specifically their progression into the specialty training phase (see Table 1). These were the culture of the working and learning environment, opportunities in professional development and the familiarity with the Specialty (see Table 1). Two further characteristics coincided with those identified previously and used within a DCE for medical trainees in general: that is working conditions and geographical location<sup>17</sup>. The levels attached to each of these characteristics were informed by the existing literature, the qualitative data and the expert knowledge of the research team. The resulting DCE was piloted with 31 F2 doctors who provided feedback on the range and wording of the attributes and levels. This piloting also allowed us to test the face validity of the DCE questionnaire. No major changes were deemed necessary based on the pilot.

Potential earnings were not identified in the qualitative work as a potential motivator of F2 doctors' decisions, but we still decided to include this characteristic in the DCE attribute to allow for

1  
2  
3 computation of willing-to-pay (WTP) values. WTP values correspond to trade-offs between changes  
4  
5 in potential earnings and the other post characteristics (e.g., how large pay increase should be to  
6  
7 compensate F2 doctors for a deterioration in working conditions). These WTP values can be used to  
8  
9 identify the most valued characteristics (i.e., those with the largest impact on F2 doctors' decisions).

10  
11  
12  
13 ----- **Table 1 about here** -----  
14

15  
16  
17 The survey explained the DCE task and described each attribute and its levels before the tasks were  
18  
19 presented. In each task, the F2s doctors were asked to choose their preferred training position  
20  
21 between two available (see Figure 1).  
22

23  
24  
25  
26 The training positions were presented in 13 choice sets, each containing two hypothetical training  
27  
28 positions. These choice sets were generated through NGENE<sup>40</sup>, a statistical software package for  
29  
30 designing choice experiments. 12 choice sets were identified as being required to investigate the  
31  
32 main effects of changes in the training position's characteristics on respondents' choices. In addition,  
33  
34 one choice set was repeated (task #13) to check for choice consistency (i.e. whether the respondents  
35  
36 answered consistently to a repeated choice set task. All choice sets were randomised and computed  
37  
38 into 12 choice sets, this prevented repetition of a choice task.  
39  
40

41  
42  
43 ----- **Figure 1 about here** -----  
44

#### 45 46 47 **Sample and Data Collection**

48  
49 The DCE was incorporated into the National F2 Career Destination Survey 2016<sup>4</sup> within Scotland. This  
50  
51 e-survey collects data on the career destinations of F2 doctors as near as practicable to completion  
52  
53 of their foundation training and so was considered an apt vehicle for our DCE. The Destination  
54  
55 Survey was sent to all Scottish F2 doctors due to complete FP2 in August 2016) (n=798) in June 2016,  
56  
57

1  
2  
3 and closed in August 2016. Two reminder emails were sent during this time. No formal sample size  
4 calculation was undertaken as we surveyed the whole population of FP2 doctors in Scotland. Note  
5 that for the DCE a minimum of only 35 respondents was needed to estimate sample preferences for  
6  
7 job post.  
8  
9

### 13 **Preference analysis**

14 We modelled the probability that the training position is selected as a function of the characteristics  
15 and levels being offered within that particular choice set. This can be represented via a conditional  
16 logit regression<sup>41</sup> with the underlying utility ( $V_{ntj}$ ) obtained through the characteristics of the training  
17 positions presented by the following:  
18  
19  
20  
21  
22

$$\begin{aligned} V_{ntj} = & \alpha + \beta_1 \text{Geographical Locality: Desirable} + \beta_2 \text{Familiarity with Speciality: Unfamiliar} + \beta_3 \\ & \text{Familiarity With Speciality: Quite Familiar} + \beta_4 \text{Culture of Working and learning Environment:} \\ & \text{Supportive} + \beta_5 \text{Working Conditions: Excellent} + \beta_6 \text{Working Conditions: Good} + \beta_7 \\ & \text{Opportunities in Professional Development: Excellent} + \beta_8 \text{Opportunities in Professional} \\ & \text{Development: Average} + \beta_9 \text{Potential Earnings.} \quad (1) \end{aligned}$$

23  
24  
25  
26  
27  
28  
29  
30  
31  
32  
33  
34  
35  
36  
37  
38 The five qualitative characteristics (i.e., geographical locality, familiarity with speciality, culture of  
39 working and learning environment, working conditions, and opportunities for professional  
40 development) are entered in the model as dummy coded variables and their effects on respondents'  
41 choices are captured by the ( $\beta_1$ ) to ( $\beta_8$ ) coefficients, which represent F2 doctors' preferences for the  
42 training position characteristics. The parameter ( $\beta_9$ ) measures the influence of a 1-unit change in the  
43 earnings characteristic on respondents' choices. ( $\alpha$ ) is the model intercept. For the ( $\beta$ ) parameters, a  
44 positive estimate would indicate that an increase in the corresponding characteristic would make  
45 the job position more desirable and thus more likely to be selected by the trainees. For example, a  
46 positive estimate for ( $\beta_1$ ) would indicate that a shift from "undesirable" to "desirable" geographical  
47  
48  
49  
50  
51  
52  
53  
54  
55  
56  
57  
58  
59  
60

1  
2  
3 location makes a training position more attractive. To locate these preference estimates on a more  
4  
5 meaningful (or easier to interpret) scale, we compute WTP values as the ratio of preferences for  
6  
7 each training position characteristic ( $\beta_1$ : $\beta_8$ ) and potential earnings ( $\beta_9$ ). These WTP values indicate  
8  
9 how much the respondents would be willing to pay to improve the job characteristic (or should be  
10  
11 compensated for a deterioration in the characteristic) (e.g., how much financial income would need  
12  
13 offered to compensate a trainee for a position offering an “undesirable” location rather than a  
14  
15 “desirable” location). This in turn allows us to directly state the relative importance of the  
16  
17 characteristics in the career decision making.  
18  
19  
20  
21

### 22 **Preferences heterogeneity analysis**

23  
24 The analysis above provides an estimate of the preferences for the average respondent within our  
25  
26 sample. We therefore further explored whether preferences for training post characteristics vary by  
27  
28 specific personal characteristics. Following the literature on career decision making of junior doctors,  
29  
30 we considered the impact of the following variables:  
31

- 32 • Graduate Entrant on entering Medical School (Graduate VS Non-Graduate)<sup>25</sup>
- 33
- 34 • Gender (Male Vs Female)<sup>8-10</sup>
- 35
- 36 • Country of Origin (Scotland, Rest of the World VS R/UK)<sup>16,18</sup>
- 37
- 38 • Application for Further Training (Application Made Vs No Application)<sup>1-6</sup>
- 39
- 40
- 41
- 42

43 To assess the variability in F2 choices we included interaction terms of these personal characteristics  
44  
45 with the training post characteristics. Given the positive signs on the main effects a statistically  
46  
47 significant interaction effect (along with its accompanying sign) will indicate whether that particular  
48  
49 personal characteristic is associated with an increased (positive sign) or reduced (negative sign)  
50  
51 strength of preference for the training post characteristic. However, this strategy would lead to a  
52  
53 model with a relatively large number of parameters (i.e., each of the nine preference parameters ( $\beta$ )  
54  
55 can be interacted with the five personal characteristics parameters, leading thus to 45 interaction  
56  
57  
58  
59  
60

1  
2  
3 effects, for a total of 55 model parameters). Thus for ease of reporting and interpretation, we used  
4  
5 stepwise regression to identify the most relevant interaction effects and specify a more  
6  
7 parsimonious choice model. All personal characteristics with a non-significant result using a  
8  
9 significance level of 20% (P-value < 0.2) were removed in the final conditional logistic regression  
10  
11 model analysis.  
12  
13  
14

### 15 **Ethics**

16  
17 Ethical approval was granted for all components of this work by the College of Life Sciences and  
18  
19 Medicine Ethical Research Board (CERB), University of Aberdeen, and the study was also approved  
20  
21 by NHS Research Scotland (NHS R&D).  
22  
23  
24  
25  
26  
27  
28  
29  
30  
31  
32  
33  
34  
35  
36  
37  
38  
39  
40  
41  
42  
43  
44  
45  
46  
47  
48  
49  
50  
51  
52  
53  
54  
55  
56  
57  
58  
59  
60

## **Results**

The DCE was answered by 677/798 F2 doctors, giving an 84.8% response rate. Of these, 58.6% (n=397) were female, 40% (n=271) male, with 9 not indicating their gender. 74.6% (n=505) had graduated from medical school in Scotland, 20.8% (n=141) graduated elsewhere in the UK, and 4.1% (n=28) graduated outside the UK. Three participants did not indicate where they graduated and were classified as missing data. 60.3% (n=408) were Scottish born, 24.8% (n=168) born elsewhere in the UK, and the others from outside the UK (14.9% [n=101]). 78.6% (n=532) had gone to medical school as undergraduates and 21.4% (n=145) as graduate entrants. 54.7% (n=370) applied for speciality/core/GP training and 45.3% (n=307) did not apply for any training.

We removed 6 respondents because of issues on DCE data: One trainee did not complete the DCE questions, 5 trainees answered serially for each question (e.g. they systematically answered choice 1 (or choice 2) in the DCE tasks) or answered differently to a repeated choice task providing thus no information about their preferences for position characteristics. This represents an 84.1% usable response rate.

## **Main effect Model for Logistical Regression Analysis**

Results can be found in Table 2. The statistical significance of at least one level of each characteristic indicates that all key characteristics identified in the DCE design stage played a significant role in the choice of training position. Moreover, the positive coefficients indicate that an improvement in the characteristic was associated with an increased preference for a training post. On average F2 doctors prefer a familiar training position with a more desirable location, which offers a supportive working culture, better working conditions and opportunities for professional development.

## **WTP analysis**

1  
2  
3 The willingness-to-pay (WTP) values along with their confidence intervals are displayed in the last  
4 column of Table 2. For F2s to accept a training position with an undesirable rather than a desirable  
5 geographical location, the expected potential earnings should be increased by 45.74%. This is the  
6 largest estimated WTP value, indicating thus that a move from a desirable to an undesirable location  
7 would be the main driver of F2 doctors' choices.  
8  
9  
10  
11  
12

13  
14  
15 Additionally, supportive culture was also found to be highly valued by F2 trainees. The respondents  
16 valued the move from a supportive working environment at 40.02% above average expected  
17 earnings. Thus, a training post that offers an unsupportive culture for trainee doctors must offer a  
18 compensation of just over 40% above average potential earnings, before it will be considered  
19 attractive training.  
20  
21  
22  
23  
24  
25

26  
27  
28 The working conditions attribute was also highly valued by F2 doctors who valued the move from  
29 excellent to poor working conditions as equivalent to 38.54% of their annual potential income.  
30  
31 However, within this attribute the move from good working conditions to poor working conditions  
32 provides the higher value (equivalent to 29% of their annual potential income). The additional move  
33 from good to excellent working conditions only provided the equivalent of an additional 9.5%  
34 increase in annual potential income.  
35  
36  
37  
38  
39  
40

41  
42  
43 Furthermore, F2s valued a move from a training post with average opportunities in professional  
44 development (CPD) to a training post that offered excellent CPD more highly than a move from poor  
45 to average CPD opportunities. The move from poor to excellent professional development was  
46 valued at 31% of average expected earnings. Whereas a move from average to poor opportunities  
47 in professional development was valued at 12.8% of average expected earnings.  
48  
49  
50  
51  
52  
53  
54  
55  
56  
57  
58  
59  
60

1  
2  
3 Additionally, F2s valued working in a very familiar speciality more highly than a quite familiar  
4 speciality. A move from a very familiar speciality to an unfamiliar speciality would need to be  
5 compensated more than 18%, with this mostly explained by the finding that a move from a quite  
6 familiar speciality to an unfamiliar one would need to be compensated by more than 14%.  
7  
8  
9

### 10 11 12 13 **Preferences heterogeneity analysis**

14 We investigated how F2 doctors' personal characteristics may affect their training post preferences.  
15 The results are reported in Table 3. Note that the number of observations in this final model are  
16 lower than in the previous model because nine respondents with missing values on their personal  
17 characteristics had to be removed from the analysis.  
18  
19  
20  
21  
22

23  
24  
25  
26 ..... **Table 3 around here** .....  
27

28  
29  
30 Nine interaction effects reached significance at the 95% confidence level. The results indicate that  
31 males value a desirable location and supportive culture less than female trainees as indicated by the  
32 negative signs on the relevant interaction terms. F2 doctors born outside the UK value a desirable  
33 location less than F2 doctors from the rest of the UK (excluding Scotland). Graduate entrant trainees  
34 place less value on a desirable location, supportive culture and excellent opportunities in  
35 professional development than F2 who were non-graduates on applying for medical school. F2  
36 doctors who stated that they had applied for speciality, core or GP training placed significantly less  
37 value on a supportive culture and excellent working conditions than those who did not apply for  
38 continued training after F2. However, those that did apply valued a quite familiar speciality more  
39 than those who did not apply.  
40  
41  
42  
43  
44  
45  
46  
47  
48  
49  
50



## Discussion

To the best of our knowledge, this is the first study of Foundation Year 2 doctors' career decision making that assesses not just the value F2 doctors place on attributes of a training post but also the relative strength of these preferences. We found that all training post attributes in the model influenced the choices of our respondents. However, one attribute stood out as being most valued: desirability of geographical location. F2 doctors were willing to trade up to 45% of their average expected earnings to have a training post which was in a desirable location (defined as offering amenities and proximity to family and friends) compared to undesirable location. While this attribute could arguably be said to have little to do with the nature of the post as such, attributes that were more directly job-related were also very highly valued. For example, F2 doctors were willing to trade around 40% of their average expected earnings to have a training post with a supportive culture compared to one with an unsupportive culture, and just over 38% of their average expected earnings to move from excellent working conditions to poor. These valuations were strongest between poor and good, compared to good and excellent. This is in line with previous UK research that highlighted that the change most valued for medical students and trainee doctors was from poor to good working conditions<sup>17,30</sup>.

We found relatively few significant interactions between F2 doctor characteristics and preferences, suggesting that, although our sample was heterogeneous in terms of gender, ethnicity, origin, graduate entrants, non-graduate entrants to medical school, they were remarkably homogenous in terms of the factors they value in a medical career. The few differences related to F2 characteristics indicated, first, females value a desirable location and supportive working and learning culture more than their male counterparts. Differences between male and female medical students and doctors for job-related preferences are well established<sup>8,9,18</sup>. Typically, women have tended to prioritise

1  
2  
3 work-life balance more than men. We found that factors which could loosely be related to this  
4 (desirable location, supportive environment) were more important to women – but they were also  
5 important to our male respondents, just a little less so. This suggests that traditional gender  
6 differences in medicine are shifting, and previous marked differences between men and women may  
7 not be so apparent in the current generation.  
8  
9  
10  
11  
12

13  
14  
15 Second, those who entered medicine as graduates placed less value on a desirable location and  
16 supportive culture than those who entered medical school as school leavers. Similar findings were  
17 found by Cleland et al. (2017). The methodology of our study means we cannot identify why this is  
18 the case, but drawing on other research, this may be associated with the need to get a job/training  
19 post without delay due to level of debt<sup>42,43</sup> or greater family responsibilities<sup>44</sup>. Or, alternatively, it  
20 could be that this group are more confident of their abilities and less reliant on support from work  
21 colleagues than their school leaver equivalents<sup>45,46</sup>. Future qualitative research is needed to gain  
22 further insight.  
23  
24  
25  
26  
27  
28  
29  
30  
31  
32  
33

34 Data shows that 50% of graduates completing the foundation programme did not apply for speciality  
35 training or core medical training<sup>4</sup>. Our study shows that F2 doctors who applied for training placed  
36 significantly less value on excellent working conditions and a supportive culture than those who did  
37 not do so. Again, we do not know the reasons for this but it merits further investigation, perhaps  
38 using qualitative methodologies to explore differences in personal characteristics such as self-  
39 efficacy<sup>47,48</sup>, experience of social support from senior staff and co-workers<sup>47,49</sup>, and/or prior  
40 experience<sup>10</sup>. Anecdotal evidence suggests that some trainees are reluctant to apply for further  
41 training until they have gained additional experience and because once they have committed to a  
42 speciality (or training programme), career changes are difficult. This is acknowledged in the medical  
43 literature: a recent report by the GMC argues that more flexibility is needed in training to  
44 acknowledge prior learning and allow trainees to transition between specialities with more ease<sup>50</sup>.  
45  
46  
47  
48  
49  
50  
51  
52  
53  
54  
55  
56  
57  
58  
59  
60

1  
2  
3 Increasing flexibility in this way may well help recruitment but our study shows that good working  
4 conditions and a supportive culture are also of great importance to trainees.  
5  
6  
7

8  
9 For those doctors who did apply for core/higher/GP training in their F2 year, being quite familiar  
10 with a specialty was highly valued. This makes intuitive sense: committing to training can be seen as  
11 committing to a very specific medical career. Knowing a little about the specialty and the nature of  
12 the work seems a reasonable prerequisite for making such a decision. This reinforces the  
13 importance of giving medical students and trainees a wide range of experiences, in order to  
14 encourage trainees into the breadth of specialities.  
15  
16  
17  
18  
19  
20  
21  
22  
23

24 An important strength of this study is that it surveyed all F2 doctors in Scotland: that is, those at a  
25 critical point in medical careers decision making, the traditional time of committing to training in a  
26 specific specialty. Our focus was generic “push-pull” factors<sup>51</sup> rather than specialty choice (e.g., a  
27 preference for surgery or general practice), so we could not investigate possible links between these  
28 preferences and specialty preferences. This means that we could not compare if compensation  
29 values varied between those whose preference was to apply for a popular specialty, versus those  
30 who were intending to apply to a less competitive specialty. However, this generic focus allowed us  
31 to pull out differences between those who did, and did not, apply for core medical training or  
32 specialty training, at the standard time.  
33  
34  
35  
36  
37  
38  
39  
40  
41  
42  
43  
44

45 There are approximately 8,000 F2 doctors in the UK at any one point in time, of whom about 10%  
46 are based in Scotland. Our sample was diverse and representative of the UK population of F2  
47 doctors in terms of: gender, graduate application rates and those who applied vs did not apply for  
48 training<sup>4</sup>. In our DCE most graduated in Scotland and were born in Scotland, this statistic is  
49 something that may differ from the rest of the UK. However, Cleland et al. (2016) did not find any  
50 statistical significance in the preference choices between trainees from different regions of the UK.  
51  
52  
53  
54  
55  
56  
57  
58  
59  
60

1  
2  
3 While our opt-out clause was explicit, and selected by a proportion of potential respondents, our  
4 survey escaped the usual response to an e-survey request, that of automatic deletion. The study  
5 was carried out after the national application and selection process for core, specialty or GP training  
6 was almost complete. Our participants had thus been thinking about their future medical career in  
7 the previous months, so the timing of our DCE was good. An interesting area for future research may  
8 be to access specialty training applications to compare the DCE responses with trainees' actual  
9 careers-related behaviour.  
10  
11  
12  
13  
14  
15  
16  
17  
18

19 As mentioned previously, the DCE methodology has been used in other contexts with those in the  
20 early stages of medical training. Work from Australia, using a study-specific DCE, found that doctors  
21 in their first three years of hospital medicine training post-graduation were willing to sacrifice up to  
22 50% of their expected income to control their time on call (the MABEL study<sup>34</sup>). The same  
23 programme of work also looked at how to attract GPs in Australia into rural posts, identifying the  
24 monetary value doctors placed on staying in post compared to moving to a different location<sup>36</sup>. The  
25 only other DCE we have identified utilised medical students in Norway, again focusing on GP  
26 recruitment<sup>52</sup>. This identified that the opportunity to control working hours and opportunities in  
27 professional advancement lead to a higher probability of medical students considering a move to a  
28 rural location when they were fully qualified<sup>52</sup>. While it is difficult to compare across different DCE  
29 studies because of the bespoke nature of DCEs, there seem to be some common denominators in  
30 terms of what could broadly be termed working conditions. The arguably non-work-related factor of  
31 location may also have been important in the MABEL and Norwegian studies: we cannot tell if this  
32 was the case as in both studies the DCE attributes focused only on work-related factors (more  
33 general factors such as location near friends and family were not incorporated). It may be that some  
34 factors are country-specific but only cross-context studies will provide this insight.  
35  
36  
37  
38  
39  
40  
41  
42  
43  
44  
45  
46  
47  
48  
49  
50  
51  
52  
53  
54  
55  
56  
57  
58  
59  
60

1  
2  
3 This is the first study that focusses on the career decision making of UK doctors at a critical career  
4 decision making point, that of applying, or not, for core medical training or specialty training. We  
5 have identified that both location and specific job-related attributes are highly valued by junior  
6 doctors when making careers decisions. Location is not something that can change. However, a  
7 supportive working and learning culture is something that a healthcare organisation has the power  
8 to change from within. Focusing on providing a supportive working environment is something that  
9 may help attract and retain medical trainees, meeting their needs and those of service delivery by  
10 strengthening the commitment of doctors in training to working in the NHS<sup>53</sup>.  
11  
12  
13  
14  
15  
16  
17  
18  
19  
20  
21  
22  
23  
24  
25  
26  
27  
28  
29  
30  
31  
32  
33  
34  
35  
36  
37  
38  
39  
40  
41  
42  
43  
44  
45  
46  
47  
48  
49  
50  
51  
52  
53  
54  
55  
56  
57  
58  
59  
60

### **Contributions**

JC, PJ and KW had the original idea for this project and obtained the funding for GS's doctorate. The development of the DCE was led by GS in collaboration with JC, PJ, KW and DS. GS prepared the ethics application. GS lead on the literature review. DS and NK supervised the analysis, which was carried out by GS. JC, PJ and KW contributed throughout the analysis of the DCE. GS drafted the paper guidance from DS and NK for the methods, analysis and results sections, with JC revising drafts. All authors contributed to the final paper. The study is guaranteed by the University of Aberdeen.

### **Ethical permission**

Ethical permission was granted for this study from the University of Aberdeen College of Life Sciences and Medicine Ethics Research Board (CERB/2015/12/1269, approval granted 22/04/16).

### **Funding**

Our thanks go to NHS Education for Scotland for funding this programme of work.

### **Competing Interests**

There are no competing interests in this study

### **Data Sharing**

All available data can be obtained by contacting the corresponding author (Gillian Scanlan).

### **Acknowledgements**

Our thanks to all those who participated in developing and piloting the DCE and completing the survey. With thanks to NHS Education Scotland for merging the DCE onto the destination survey.

## References

1. Arthur MB, Khapova SN, & Wilderom CPM. Career success in boundaryless world. *J Organ behave.* 2005;26, 177-202.
2. Rimmer A. Nearly half of trainees chose not to progress straight into specialty training in 2015. *BMJ careers.*  
[http://careers.bmj.com/careers/advice/Nearly\\_half\\_of\\_trainees\\_chose\\_not\\_to\\_progress\\_straight\\_to\\_specialty\\_training\\_in\\_2015](http://careers.bmj.com/careers/advice/Nearly_half_of_trainees_chose_not_to_progress_straight_to_specialty_training_in_2015) (Accessed 8th of March 2016).
3. UK foundation Programme Office. F2 Career Destination Report 2015.  
<http://www.foundationprogramme.nhs.uk/pages/home/keydocs> (Accessed 5th of March, 2016).
4. UKFPO CAREER DESTINATION REPORT 2016  
[www.foundationprogramme.nhs.uk/download.asp?file=Careers\\_destination\\_2016.pdf](http://www.foundationprogramme.nhs.uk/download.asp?file=Careers_destination_2016.pdf)  
(accessed 8<sup>th</sup> of March 2017)
5. Smith C, Low L. The gap between foundation years and specialty training. *BMJ Careers* 21st February 2012. <http://careers.bmj.com/careers/advice/view-article.html?id=20006722>.  
(Accessed 5<sup>th</sup> of November 2016)
6. General Medical Council. Interactive reports to investigate factors that affect progression of doctors in training.  
[http://www.gmcuk.org/Briefing\\_note\\_Exams\\_and\\_recruitment\\_outcome\\_reports.pdf\\_6006997.pdf\\_60086828.pdf](http://www.gmcuk.org/Briefing_note_Exams_and_recruitment_outcome_reports.pdf_6006997.pdf_60086828.pdf) (Accessed on the 16th of May 2016)
7. Collins A, Young R. (eds.) *The Future of Career.* Cambridge: Cambridge University Press; 2000.

- 1
- 2
- 3 8. Riska E. Gender and Medical Careers. *Maturitas*. 2011; 68 (3), 264-267.
- 4
- 5
- 6 9. Behrend TS, Thompson LF, Meade AW, Grayson MS, Newton DA. Gender Differences in
- 7 Career Choice Influences. *Industrial and Organisational Psychology*. 22nd Annual Meeting,
- 8 New York. 2007.
- 9
- 10
- 11
- 12 10. Pianosi K, Bethune C, Hurley KF. Medical student career choice: a qualitative study of fourth-
- 13 year medical students at Memorial University, Newfoundland. *CMAJ Open*. 2016; 4 (2).
- 14
- 15
- 16
- 17 11. Viscomi M, Larkins S, Gupta TS. Recruitment and retention of general practitioners in rural
- 18 Canada and Australia: a review of the literature. *Can J Rural Med*. 2013;18:13–23.
- 19
- 20
- 21
- 22 12. New Zealand Ministry of Health. Voluntary Bonding Scheme; 2012.
- 23 <http://www.health.govt.nz/our-work/health-workforce/voluntary-bonding-scheme>
- 24 (Accessed 3rd March 2017).
- 25
- 26
- 27
- 28
- 29 13. Pathman DE, Konrad TR, King TS, Taylor DH, Koch GG. Outcomes of states' scholarship, loan
- 30 repayment, and related programs for physicians. *Med Care*. 2004;42:560–8.
- 31
- 32
- 33
- 34 14. Rao KD, Ryan M, Shroff Z, Vujicic M, Ramani, S. Rural Clinician Scarcity and Job Preferences
- 35 of Doctors and Nurses in India: A Discrete Choice Experiment. *PLoS ONE*. 2013; 8 (12).
- 36
- 37
- 38
- 39 15. Takemura T, Kielmann K, Blaauw, D. (2016). Job Preferences among clinical officers in public
- 40 sector facilities in rural Kenya: a discrete choice experiment. *Human Resources for Health*.
- 41 2016; 14 (1).
- 42
- 43
- 44
- 45 16. Verma P, Ford J.A, Stuart A, Howe, A, Everington S, Steel N. A systematic review of
- 46 strategies to recruit and retain primary care doctors. *BMC Health Services*. 2016;16, 126.
- 47
- 48
- 49
- 50 17. Cleland J, Johnston PW, Watson V, Krucien, N, Skatun D. What do UK doctors in training
- 51 value in a post? A discrete choice experiment. *Med Educ*. 2016; 50: 189-202.
- 52
- 53
- 54
- 55
- 56
- 57
- 58
- 59
- 60



18. Gibis B, Heinz A, Jacob R & Muller CH. The Career Expectations of Medical Students: findings from a Nationwide Survey in Germany. *Dtsch Arztebl Inter.* 2012; 109 (18), 327-332.
19. Rich A, Viney R, Needleman S, Griffin A, Woolf K. You can't be a person and a doctor': the work-life balance of doctors in training- a qualitative study. *BMJ Open.* 2016; 6 :e013897
20. Cleland J, Johnston PW, French FH, Needham G. Associations between medical school and career preferences in Year 1 medical students in Scotland. *Med Educ.* 2012. 46 (5), 473-484.
21. Cleland JA, Johnston PW, Anthony M, Khan N, Scott NW. A survey of factors influencing career preference in new-entrant and exiting medical students from four UK medical schools. *BMC Med Educ.* 2014; 14, 151.
22. Williams C, Cantillon P. A surgical career? The views of junior women doctors. *Medical Educ.* 2001; 34 (8), 602-607.
23. Taylor KS, Lambert TW, Goldacre ML. Career progression and destinations, comparing men and women in the NHS: postal questionnaire survey. *BMJ.* 2009; 33, 1735.
24. Boyle E, Healy D, Hill ADK, O'Connell PRO, Kerin M et al. Career choices of today's medical students: where does surgery rank? *Irish J of Med Sci.* 2013; 182, 337-343.
25. Svirko E, Lambert T, Goldacre MJ. Gender, ethnicity and graduate status, and junior doctors' self-reported preparedness for clinical practice: national questionnaire surveys. *J Roy Soc Med.* 2014;107 (2), 66-74.
26. Smith F, Lambert TW, Goldacre MJ . Demographic characteristics of doctors who intend to follow clinical academic careers: UK national surveys 2014.
27. Brennan N, Corrigan O, Allard J, Arche J., et al. The transition from medical student to junior doctor: today's experiences of Tomorrow's Doctors. *Med Educ.* 2010; 44 (5), 449-458.

- 1  
2  
3 28. Spooner S, Gibson J, Rigby D, Sutton M, Pearson E, Checkland K. Stick or Twist? Career  
4  
5 decision-making during contractual uncertainty for NHS Junior Doctors. *BMJ Open*. 2017;7:  
6  
7 e013756.  
8  
9  
10  
11  
12 29. Watmough S, Taylor D, Ryland I. Using questionnaires to determine whether medical  
13  
14 graduates' career choice is determined by undergraduate or postgraduate experiences. *Med*  
15  
16 *Teach*. 2007; 29 (8), 830-832.  
17  
18  
19 30. Cleland JA, Johnston P, Watson V, Krucien, N, Skatun D. (2017). What do UK medical  
20  
21 students value most in their career? A discrete choice experiment. *Med Educ*. 2017;  
22  
23 doi:10.1111/medu.13257.  
24  
25  
26 31. Ubach C, Scott A, French F, Awramenko M, Needham G. What do hospital consultants value  
27  
28 about their jobs? A discrete choice experiment, *BMJ*. 2003; 326: 1432.  
29  
30  
31 32. Lachish S, Goldacre MJ, Lambert T. Associations between institutional support, job  
32  
33 enjoyment, and attitudes to work in first-year doctors in the UK: national questionnaire  
34  
35 survey. *BMC Med Educ*. 2016; 16:151.  
36  
37  
38 33. Lambert TW, Goldacre MJ, Evans J. Views of junior doctors about their work: survey of  
39  
40 qualifiers of 1993 and 1996 from United Kingdom medical schools. *Med Educ*. 2000; 34, 348-  
41  
42 354.  
43  
44  
45  
46  
47  
48 34. Sivey P, Scott A, Witt J, Joyce C, Humphreys J. Junior doctors' preferences for specialty  
49  
50 choice. *J Health Economics*. 2012; 31 (6), 813-823.  
51  
52  
53  
54  
55  
56  
57  
58  
59  
60

- 1  
2  
3 35. Sivey P, Scott A, Witt J, Joyce C, Humphreys J. Why Junior Doctors Don't Want to Become  
4  
5 General Practitioners: A Discrete Choice Experiment from the MAYBEL Longitudinal study of  
6  
7 Doctors. Melbourne Institute Working Paper. 2010; 17/10.  
8  
9  
10 36. Scott A, Witt J, Humphreys J, Joyce C, Kalb G, Jeon SH, McGrail M. Getting doctors into the  
11  
12 bush: General Practitioners' preferences for rural location. *J Social Science and Medicine*.  
13  
14 2013; 96, 33-44.  
15  
16 37. Ryan M, Gerard K, Amaya-Amaya M. Using Discrete choice experiments to value health and  
17  
18 Health care, Vol.11. Dordrecht, The Netherlands: Springer 2008.  
19  
20  
21 38. Ryan, M, Gerard K, Currie G. Using Discrete Choice Experiments in Health Economics. In: The  
22  
23 Elgar Companion to Health Economics. Jones, A.M. (ed). Edward Elgar. 2012.  
24  
25  
26 39. Klojgaard M, Bech M, Sogaard R. Designing a stated choice experiment: The value of a  
27  
28 qualitative process. *J of Choice Model*. 2012;5: 1-18.  
29  
30  
31 40. Ngene 1.1.2 USER MANUAL & REFERENCE GUIDE. The Cutting Edge in Experimental Design.  
32  
33 2014  
34  
35  
36 41. McFadden D. "Conditional Logit Analysis of Qualitative Choice Behavior." In *Frontier in*  
37  
38 *Econometrics*, 105–42. New York: Academic Press. 1974  
39  
40  
41 42. First Year Medical Students Finance Survey. BMA [https://www.bma.org.uk/-](https://www.bma.org.uk/-/media/files/pdfs/working%20for%20change/shaping%20healthcare/firstyearstudentfinancereport2012and2013.pdf?la=en)  
42  
43 [/media/files/pdfs/working%20for%20change/shaping%20healthcare/firstyearstudentfinancereport2012and2013.pdf?la=en](https://www.bma.org.uk/-/media/files/pdfs/working%20for%20change/shaping%20healthcare/firstyearstudentfinancereport2012and2013.pdf?la=en). (Accessed 8th of March 2016).  
44  
45  
46  
47 43. Grayson MS, Newton DA, Thompson LF. Payback time: the associations of debt and income  
48  
49 with medical student career choice. *Med Educ*. 2012; 46, 983-991.  
50  
51  
52 44. Yvette P, Ben-Shlomo Y. Older doctors and progression through specialty training in the UK:  
53  
54 a cohort analysis of General Medical Council data. *BMJ Open*. 2015; 5:e005658.  
55  
56  
57  
58  
59  
60

- 1  
2  
3 45. Madden L, Mathias BD, Madden TM. In good company. The impact of perceived  
4 organizational support and positive relationships at work on turnover intentions. J  
5 Management Research Review. 2015;38 (3).  
6  
7  
8  
9  
10 46. Lunenburg FC. Self-Efficacy in the Workplace: Implications for Motivation and Performance.  
11 Inter J of Management, Business, and Administration. 2011; 14,1.  
12  
13  
14 47. Chou P. The Effects of Workplace Social Support on Employee's Subjective Well-being. Euro J  
15 of Business and Management. 2015; 7 (6).  
16  
17  
18  
19 48. Bandura A. Cultivate self-efficacy for personal and organizational effectiveness. Oxford:  
20 Blackwell. 2000  
21  
22  
23  
24 49. Judge TA, Erez A, Bono JE, Thoresen C J. "Are Measures of Self-Esteem, Neuroticism, Locus of  
25 Control, and Generalized Self-Efficacy Indicators of a Common Core Construct?", J  
26 Personality and Social Psychology. 2002; 83(3), 693-710.  
27  
28  
29  
30  
31 50. The GMC.  
32  
33 [http://www.gmcuk.org/Adapting for the future a plan for improving the flexibility of](http://www.gmcuk.org/Adapting_for_the_future_a_plan_for_improving_the_flexibility_of_UK_postgraduate_medical_training_FINAL.pdf_69842348.pdf)  
34 [UK postgraduate medical training FINAL.pdf\\_69842348.pdf](http://www.gmcuk.org/Adapting_for_the_future_a_plan_for_improving_the_flexibility_of_UK_postgraduate_medical_training_FINAL.pdf_69842348.pdf) (Accessed 25th of September  
35 2017).  
36  
37  
38  
39  
40 51. Castles S, Miller, MJ. The age of Migration: international population movements in the  
41 Modern world, 4th edn. New York, NY: Guilford. 2009  
42  
43  
44  
45 52. Holte JH, Kjaer T, Abelsen B, Olsen JA. The impact of pecuniary and non-pecuniary incentive  
46 for attracting young doctors to rural general practice. Social Science and Medicine. 2015;  
47 128, 1-9.  
48  
49  
50  
51  
52 53. Eisenberger R, Stinglhamber F, Vandenberghe C, Sucharski IL, Rhoades L. Perceived  
53 Supervisor Support: Contributions to Perceived Organizational Support and Employee  
54 Retention. Journal of Applied Psychology. 2002; 87, 3, 565–573.  
55  
56  
57  
58  
59  
60

1  
2  
3  
4  
5  
6  
7  
8  
9  
10  
11  
12  
13  
14  
15  
16  
17  
18  
19  
20  
21  
22  
23  
24  
25  
26  
27  
28  
29  
30  
31  
32  
33  
34  
35  
36  
37  
38  
39  
40  
41  
42  
43  
44  
45  
46  
47  
48  
49  
50  
51  
52  
53  
54  
55  
56  
57  
58  
59  
60

For peer review only

1  
2  
3  
4  
5  
6  
7  
8  
9  
10  
11  
12  
13  
14  
15  
16  
17  
18  
19  
20  
21  
22  
23  
24  
25  
26  
27  
28  
29  
30  
31  
32  
33  
34  
35  
36  
37  
38  
39  
40  
41  
42  
43  
44  
45  
46  
47  
48  
49  
50  
51  
52  
53  
54  
55  
56  
57  
58  
59  
60

For peer review only

**Table 1. Characteristics of training positions and the range of possible levels presented within the choice scenarios.**

| Characteristics                              | Description                                                                                                                                                                                   | Possible Levels                                                                                           |
|----------------------------------------------|-----------------------------------------------------------------------------------------------------------------------------------------------------------------------------------------------|-----------------------------------------------------------------------------------------------------------|
| Geographical Locality                        | This refers to the geographical location of the training position including amenities on offer, and the proximity to your family and friends, and/or spouse/partner employment opportunities. | Desirable Location<br>Undesirable Location                                                                |
| Familiarity With Specialty                   | This refers to how familiar you are with the specialty, whether you have rotated around it previously or have knowledge or experience of it.                                                  | Unfamiliar<br>Quite familiar<br>Very familiar                                                             |
| Culture of Working and Learning Environment. | This refers to perceiving that you are a valued and respected member of staff whose training and learning needs are supported.                                                                | Supportive Culture<br>Unsupportive Culture                                                                |
| Potential Earnings                           | This refers to how your potential earnings compare against average career earnings in your chosen specialty after completing training.                                                        | Average Earnings<br>5% above average earnings<br>10% above average earnings<br>20% above average earnings |
| Working Conditions                           | This refers to working conditions, such as rotas and shift patterns, amount of on call, time off and staffing levels.                                                                         | Excellent Conditions<br>Good Conditions<br>Poor Conditions                                                |
| Opportunities for Professional Development   | This refers to opportunities to undertake academic research, teaching, and training throughout your training programme and career.                                                            | Excellent opportunities<br>Average opportunities<br>Poor opportunities                                    |

1  
2  
3  
4  
5  
6  
7  
8  
9  
10  
11  
12  
13  
14  
15  
16  
17  
18  
19  
20  
21  
22  
23  
24  
25  
26  
27  
28  
29  
30  
31  
32  
33  
34  
35  
36  
37  
38  
39  
40  
41  
42  
43  
44  
45  
46  
47  
48  
49  
50  
51  
52  
53  
54  
55  
56  
57  
58  
59  
60

For peer review only



1  
2  
3  
4  
5 **Figure 1: DCE instructions and an example choice scenario**  
6

7 In this section of the survey we are interested in the factors that have influenced your career  
8 decision making in your FY2 year and what characteristics are the most important when making a  
9 decision on whether to apply for specialty training, core training or GP training programmes. This  
10 section of the survey will ask you a series of choices on what post FY2 training place you would  
11 prefer based on characteristics of training places.  
12  
13  
14  
15  
16

17 Now you will be given a series of 13 choices to make that are all slightly different. For each choice  
18 you will be asked two separate questions. One will be to select which option you **prefer** between  
19 the 2 training positions on offer. You may not like either post but we would like you to state which  
20 one you think is better!  
21  
22  
23  
24  
25

26 **There are no right or wrong answers to these questions, we are just interested in your opinion!**  
27  
28  
29  
30  
31  
32  
33  
34  
35  
36  
37  
38  
39  
40  
41  
42  
43  
44  
45  
46  
47  
48  
49  
50  
51  
52  
53  
54  
55  
56  
57  
58  
59  
60

**Choice 1 of 13: Which position would you prefer?**

|                                              | <b>Position "A"</b>   | <b>Position "B"</b> |
|----------------------------------------------|-----------------------|---------------------|
| Geographical Location                        | Undesirable Location  | Desirable Location  |
| Familiarity with specialty                   | Quite Familiar        | Unfamiliar          |
| Culture of working and Learning Environment. | Unsupportive Culture  | Supportive Culture  |
| Potential Earnings                           | 10% Above Average     | 20% Above Average   |
| Working Conditions                           | Excellent Conditions  | Poor Conditions     |
| Opportunities for Professional Development   | Average Opportunities | Poor Opportunities  |

**Which position would you prefer?**  
Please tick one box

Table 2. Results of the multinomial logit (MNL) model

| Job characteristic            | MLE (SE)          | WTP (95% Confidence interval) |
|-------------------------------|-------------------|-------------------------------|
| <b>1. Model parameters</b>    |                   |                               |
| Constant                      | 0.109 (0.035)**   |                               |
| Location: Desirable           | 1.200 (0.0402)*** | -45.75 [-56.1; -35.42]        |
| Working Culture: Supportive   | 1.050 (0.0432)*** | -40.0 [-49.1; -31.0]          |
| Familiarity: Quite familiar   | 0.389 (0.052)***  | -14.83 [-18.56; -11.09]       |
| Familiarity: Very Familiar    | 0.489 (0.059)***  | -18.6 [-24.61; -12.64]        |
| Working conditions: Good      | 0.762 (0.055)***  | -29.02 [-36.23; -21.81]       |
| Working conditions: Excellent | 1.011 (0.059)***  | -38.54. [-46.9; -30.2]        |
| PDP: Average                  | 0.336 (0.044)***  | -12.8 [-16.44; -9.22]         |
| PDP: Excellent                | 0.813 (0.054)***  | -31.0 [-38.72; -23.26]        |
| Potential Earnings            | 0.026 (0.003)***  |                               |
| <b>2. Model statistics</b>    |                   |                               |
| # Respondents                 | 671               |                               |
| # Observations                | 15,964            |                               |
| # Parameters                  | 10                |                               |
| Log-likelihood                | -3,676.4          |                               |

MLE: Maximum Likelihood Estimates; SE: Standard Errors; P: P-value significance (\*\*P < 0.001; \*\* P < 0.01, \*P < 0.05; WTP: Willingness-to-pay/accept estimates as % of earnings

Table 3. Main and interaction effects.

|                                |                            | $\beta$ | SE    | P   | MLE: Maximum Likelihood Estimate; SE: Standard Error; P-value significance (***) P < 0.001; ** P < 0.01; * P < 0.05; WTP: Willingness to pay/accept estimate as % of earnings (Ratio of estimated coefficient of attribute of interest with earnings coefficient) |
|--------------------------------|----------------------------|---------|-------|-----|-------------------------------------------------------------------------------------------------------------------------------------------------------------------------------------------------------------------------------------------------------------------|
| <b>Main effects</b>            |                            |         |       |     |                                                                                                                                                                                                                                                                   |
| Constant                       | -                          | 0.114   | .035  | **  |                                                                                                                                                                                                                                                                   |
| Location (Desirable)           | -                          | 1.40    | .075  | *** |                                                                                                                                                                                                                                                                   |
| Working Culture (Supportive)   | -                          | 1.271   | .0069 | *** |                                                                                                                                                                                                                                                                   |
| Familiar (Quite)               | -                          | 0.293   | .071  | *** |                                                                                                                                                                                                                                                                   |
| Familiarity (Very)             | -                          | 0.472   | .076  | *** |                                                                                                                                                                                                                                                                   |
| Working Conditions (Good)      | -                          | 0.840   | 0.082 | *** |                                                                                                                                                                                                                                                                   |
| Working Conditions (Excellent) | -                          | 1.162   | 0.083 | *** |                                                                                                                                                                                                                                                                   |
| PDP (Average)                  | -                          | 0.361   | 0.050 | *** |                                                                                                                                                                                                                                                                   |
| PDP (Excellent)                | -                          | 0.870   | 0.061 | *** |                                                                                                                                                                                                                                                                   |
| Potential Earnings             | -                          | 0.026   | 0.003 | *** |                                                                                                                                                                                                                                                                   |
| <b>2. Interaction effects</b>  |                            |         |       |     |                                                                                                                                                                                                                                                                   |
| Location (Desirable)           | Male                       | -0.374  | 0.059 | *** |                                                                                                                                                                                                                                                                   |
| Working Culture (Supportive)   | Male                       | -0.20   | .060  | **  |                                                                                                                                                                                                                                                                   |
| Location (Desirable)           | Graduate Entry (Yes)       | -0.162  | 0.075 | *   |                                                                                                                                                                                                                                                                   |
| Working Culture (Supportive)   | Graduate Entry (Yes)       | -0.168  | .0761 | *   |                                                                                                                                                                                                                                                                   |
| PDP (Average)                  | Graduate Entry (Yes)       | -0.084  | .094  |     |                                                                                                                                                                                                                                                                   |
| PDP (Excellent)                | Graduate Entry (Yes)       | -0.224  | .106  | *   |                                                                                                                                                                                                                                                                   |
| Familiarity (Quite)            | Training Application (Yes) | 0.175   | 0.084 | *   |                                                                                                                                                                                                                                                                   |
| Familiarity (Very)             | Training Application (Yes) | 0.029   | 0.096 |     |                                                                                                                                                                                                                                                                   |
| Working Culture (Supportive)   | Training Application (Yes) | -0.172  | 0.070 | *   |                                                                                                                                                                                                                                                                   |
| Working Conditions (Good)      | Training Application (Yes) | -0.120  | .0986 |     |                                                                                                                                                                                                                                                                   |
| Working Conditions (Excellent) | Training Application (Yes) | -0.240  | .0970 | *   |                                                                                                                                                                                                                                                                   |
| Location (desirable)           | Home Country (World)       | -.255   | .098  | **  |                                                                                                                                                                                                                                                                   |
| <b>3. Model statistics</b>     |                            |         |       |     |                                                                                                                                                                                                                                                                   |
| # Respondents                  | 662                        |         |       |     |                                                                                                                                                                                                                                                                   |
| # Observations                 | 15,868                     |         |       |     |                                                                                                                                                                                                                                                                   |
| # Parameters                   | 22                         |         |       |     |                                                                                                                                                                                                                                                                   |
| Model log-likelihood           | - 3,613.1                  |         |       |     |                                                                                                                                                                                                                                                                   |

1  
2  
3  
4  
5  
6  
7  
8  
9  
10  
11  
12  
13  
14  
15  
16  
17  
18  
19  
20  
21  
22  
23  
24  
25  
26  
27  
28  
29  
30  
31  
32  
33  
34  
35  
36  
37  
38  
39  
40  
41  
42  
43  
44  
45  
46  
47  
48  
49  
50  
51  
52  
53  
54  
55  
56  
57  
58  
59  
60

For peer review only

**Table 1. Characteristics of training positions and the range of possible levels presented within the choice scenarios.**

| Characteristics                              | Description                                                                                                                                                                                   | Possible Levels                                                                                           |
|----------------------------------------------|-----------------------------------------------------------------------------------------------------------------------------------------------------------------------------------------------|-----------------------------------------------------------------------------------------------------------|
| Geographical Locality                        | This refers to the geographical location of the training position including amenities on offer, and the proximity to your family and friends, and/or spouse/partner employment opportunities. | Desirable Location<br>Undesirable Location                                                                |
| Familiarity With Specialty                   | This refers to how familiar you are with the specialty, whether you have rotated around it previously or have knowledge or experience of it.                                                  | Unfamiliar<br>Quite familiar<br>Very familiar                                                             |
| Culture of Working and Learning Environment. | This refers to perceiving that you are a valued and respected member of staff whose training and learning needs are supported.                                                                | Supportive Culture<br>Unsupportive Culture                                                                |
| Potential Earnings                           | This refers to how your potential earnings compare against average career earnings in your chosen specialty after completing training.                                                        | Average Earnings<br>5% above average earnings<br>10% above average earnings<br>20% above average earnings |
| Working Conditions                           | This refers to working conditions, such as rotas and shift patterns, amount of on call, time off and staffing levels.                                                                         | Excellent Conditions<br>Good Conditions<br>Poor Conditions                                                |
| Opportunities for Professional Development   | This refers to opportunities to undertake academic research, teaching, and training throughout your training programme and career.                                                            | Excellent opportunities<br>Average opportunities<br>Poor opportunities                                    |

1  
2  
3 **Figure 1: DCE instructions and an example choice scenario**  
4

5 In this section of the survey we are interested in the factors that have influenced your career  
6  
7 decision making in your FY2 year and what characteristics are the most important when making a  
8  
9 decision on whether to apply for specialty training, core training or GP training programmes. This  
10  
11 section of the survey will ask you a series of choices on what post FY2 training place you would  
12  
13 prefer based on characteristics of training places.  
14

15 Now you will be given a series of 13 choices to make that are all slightly different. For each choice  
16  
17 you will be asked two separate questions. One will be to select which option you **prefer** between  
18  
19 the 2 training positions on offer. You may not like either post but we would like you to state which  
20  
21 one you think is better!  
22

23  
24 **There are no right or wrong answers to these questions, we are just interested in your opinion!**  
25  
26  
27  
28  
29  
30  
31  
32  
33  
34  
35  
36  
37  
38  
39  
40  
41  
42  
43  
44  
45  
46  
47  
48  
49  
50  
51  
52  
53  
54  
55  
56  
57  
58  
59  
60

**Choice 1 of 13: Which position would you prefer?**

|                                              | <b>Position "A"</b>   | <b>Position "B"</b> |
|----------------------------------------------|-----------------------|---------------------|
| Geographical Location                        | Undesirable Location  | Desirable Location  |
| Familiarity with specialty                   | Quite Familiar        | Unfamiliar          |
| Culture of working and Learning Environment. | Unsupportive Culture  | Supportive Culture  |
| Potential Earnings                           | 10% Above Average     | 20% Above Average   |
| Working Conditions                           | Excellent Conditions  | Poor Conditions     |
| Opportunities for Professional Development   | Average Opportunities | Poor Opportunities  |

**Which position would you prefer?**  
**Please tick one box**



**Table 2. Results of the multinomial logit (MNL) model**

| Job characteristic            | MLE (SE)          | WTP (95% Confidence interval) |
|-------------------------------|-------------------|-------------------------------|
| <b>1. Model parameters</b>    |                   |                               |
| Constant                      | 0.109 (0.035)**   |                               |
| Location: Desirable           | 1.200 (0.0402)*** | -45.75 [-56.1; -35.42]        |
| Working Culture: Supportive   | 1.050 (0.0432)*** | -40.0 [-49.1; -31.0]          |
| Familiarity: Quite familiar   | 0.389 (0.052)***  | -14.83 [-18.56; -11.09]       |
| Familiarity: Very Familiar    | 0.489 (0.059)***  | -18.6 [-24.61; -12.64]        |
| Working conditions: Good      | 0.762 (0.055)***  | -29.02 [-36.23; -21.81]       |
| Working conditions: Excellent | 1.011 (0.059)***  | -38.54. [-46.9; -30.2]        |
| PDP: Average                  | 0.336 (0.044)***  | -12.8 [-16.44; -9.22]         |
| PDP: Excellent                | 0.813 (0.054)***  | -31.0 [-38.72; -23.26]        |
| Potential Earnings            | 0.026 (0.003)***  |                               |
| <b>2. Model statistics</b>    |                   |                               |
| # Respondents                 | 671               |                               |
| # Observations                | 15,964            |                               |
| # Parameters                  | 10                |                               |
| Log-likelihood                | -3,676.4          |                               |

MLE: Maximum Likelihood Estimates; SE: Standard Errors; P: P-value significance (\*\*\*P < 0.001; \*\* P < 0.01, \*P < 0.05; WTP: Willingness-to-pay/accept estimates as % of earnings

1  
2  
3  
4  
5  
6  
7  
8  
9  
10  
11  
12  
13  
14  
15  
16  
17  
18  
19  
20  
21  
22  
23  
24  
25  
26  
27  
28  
29  
30  
31  
32  
33  
34  
35  
36  
37  
38  
39  
40  
41  
42  
43  
44  
45  
46  
47  
48  
49  
50  
51  
52  
53  
54  
55  
56  
57  
58  
59  
60

For peer review only

Table 3. Main and interaction effects.

|                                |                            | $\beta$ | SE    | P   | MLE: Maximum Likelihood Estimate; SE: Standard Error; P: P-value significance (***) P < 0.001; ** P < 0.01, * P < 0.05; WTP: Willingness-to-pay/accept estimate as % of earnings (Ratio of estimated coefficient of attribute of interest with earnings coefficient) |
|--------------------------------|----------------------------|---------|-------|-----|----------------------------------------------------------------------------------------------------------------------------------------------------------------------------------------------------------------------------------------------------------------------|
| <b>Main effects</b>            |                            |         |       |     |                                                                                                                                                                                                                                                                      |
| Constant                       | -                          | 0.114   | .035  | **  |                                                                                                                                                                                                                                                                      |
| Location (Desirable)           | -                          | 1.40    | .075  | *** |                                                                                                                                                                                                                                                                      |
| Working Culture (Supportive)   | -                          | 1.271   | .0069 | *** |                                                                                                                                                                                                                                                                      |
| Familiar (Quite)               | -                          | 0.293   | .071  | *** |                                                                                                                                                                                                                                                                      |
| Familiarity (Very)             | -                          | 0.472   | .076  | *** |                                                                                                                                                                                                                                                                      |
| Working Conditions (Good)      | -                          | 0.840   | 0.082 | *** |                                                                                                                                                                                                                                                                      |
| Working Conditions (Excellent) | -                          | 1.162   | 0.083 | *** |                                                                                                                                                                                                                                                                      |
| PDP (Average)                  | -                          | 0.361   | 0.050 | *** |                                                                                                                                                                                                                                                                      |
| PDP (Excellent)                | -                          | 0.870   | 0.061 | *** |                                                                                                                                                                                                                                                                      |
| Potential Earnings             | -                          | 0.026   | 0.003 | *** |                                                                                                                                                                                                                                                                      |
| <b>2. Interaction effects</b>  |                            |         |       |     |                                                                                                                                                                                                                                                                      |
| Location (Desirable)           | Male                       | -0.374  | 0.059 | *** |                                                                                                                                                                                                                                                                      |
| Working Culture (Supportive)   | Male                       | -0.20   | .060  | **  |                                                                                                                                                                                                                                                                      |
| Location (Desirable)           | Graduate Entry (Yes)       | -0.162  | 0.075 | *   |                                                                                                                                                                                                                                                                      |
| Working Culture (Supportive)   | Graduate Entry (Yes)       | -0.168  | .0761 | *   |                                                                                                                                                                                                                                                                      |
| PDP (Average)                  | Graduate Entry (Yes)       | -0.084  | .094  |     |                                                                                                                                                                                                                                                                      |
| PDP (Excellent)                | Graduate Entry (Yes)       | -0.224  | .106  | *   |                                                                                                                                                                                                                                                                      |
| Familiarity (Quite)            | Training Application (Yes) | 0.175   | 0.084 | *   |                                                                                                                                                                                                                                                                      |
| Familiarity (Very)             | Training Application (Yes) | 0.029   | 0.096 |     |                                                                                                                                                                                                                                                                      |
| Working Culture (Supportive)   | Training Application (Yes) | -0.172  | 0.070 | *   |                                                                                                                                                                                                                                                                      |
| Working Conditions (Good)      | Training Application (Yes) | -0.120  | .0986 |     |                                                                                                                                                                                                                                                                      |
| Working Conditions (Excellent) | Training Application (Yes) | -0.240  | .0970 | *   |                                                                                                                                                                                                                                                                      |
| Location (desirable)           | Home Country (World)       | -.255   | .098  | **  |                                                                                                                                                                                                                                                                      |
| <b>3. Model statistics</b>     |                            |         |       |     |                                                                                                                                                                                                                                                                      |
| # Respondents                  | 662                        |         |       |     |                                                                                                                                                                                                                                                                      |
| # Observations                 | 15,868                     |         |       |     |                                                                                                                                                                                                                                                                      |
| # Parameters                   | 22                         |         |       |     |                                                                                                                                                                                                                                                                      |
| Model log-likelihood           | - 3,613.1                  |         |       |     |                                                                                                                                                                                                                                                                      |

# BMJ Open

## What Factors Are Critical to Attracting NHS Foundation Doctors into Speciality or Core Training: A Discrete Choice Experiment

|                                 |                                                                                                                                                                                                                                                                                                                                          |
|---------------------------------|------------------------------------------------------------------------------------------------------------------------------------------------------------------------------------------------------------------------------------------------------------------------------------------------------------------------------------------|
| Journal:                        | <i>BMJ Open</i>                                                                                                                                                                                                                                                                                                                          |
| Manuscript ID                   | bmjopen-2017-019911.R1                                                                                                                                                                                                                                                                                                                   |
| Article Type:                   | Research                                                                                                                                                                                                                                                                                                                                 |
| Date Submitted by the Author:   | 21-Nov-2017                                                                                                                                                                                                                                                                                                                              |
| Complete List of Authors:       | Scanlan, Gillian; Aberdeen University; NA,<br>Cleland, Jennifer; University of Aberdeen<br>Johnston, Peter; NHS Education for Scotland, North Deanery<br>Walker, Kim; NHS Education for Scotland., NHS Education for Scotland and<br>UK Foundation Programme<br>Krucien, Nicolas; Univ Aberdeen<br>Skatun, Diane; University of Aberdeen |
| <b>Primary Subject Heading</b>: | Medical education and training                                                                                                                                                                                                                                                                                                           |
| Secondary Subject Heading:      | Health economics                                                                                                                                                                                                                                                                                                                         |
| Keywords:                       | EDUCATION & TRAINING (see Medical Education & Training), HEALTH ECONOMICS, MEDICAL EDUCATION & TRAINING                                                                                                                                                                                                                                  |
|                                 |                                                                                                                                                                                                                                                                                                                                          |

SCHOLARONE™  
Manuscripts

Only

1  
2  
3 **What Factors Are Critical to Attracting NHS Foundation Doctors into Speciality or Core Training: A**  
4  
5 **Discrete Choice Experiment**  
6  
7

8  
9 **Gillian Scanlan<sup>1</sup>, Jennifer Cleland<sup>2</sup>, Peter Johnston<sup>3</sup>, Kim Walker<sup>4</sup>, Nicolas Krucien<sup>5</sup>, Diane Skåtun<sup>5</sup>**  
10

11  
12  
13 <sup>1</sup> PhD candidate, Centre for Healthcare Education Research and Innovation (CHERI), Institute of  
14  
15 Education for Medical and Dental Sciences, School of Medicine, Dentistry and Nutrition, University of  
16  
17 Aberdeen, Aberdeen, Foresterhill, AB25 2ZD  
18

19  
20 <sup>2</sup> John Simpson Chair of Medical Education, Centre for Healthcare Education Research and  
21  
22 Innovation (CHERI), Institute of Education for Medical and Dental Sciences, School of Medicine,  
23  
24 Dentistry and Nutrition, University of Aberdeen, Aberdeen, Foresterhill, AB25 2ZD  
25

26  
27 <sup>3</sup> Depute Postgraduate Dean, NHS Education for Scotland, Scotland Deanery (North),

28  
29 <sup>4</sup> Scotland Foundation School Director, NHS Education for Scotland, Foresterhill, Aberdeen, AB25 2ZP

30  
31 <sup>5</sup> Research Fellow and Senior Research Fellow respectively, Health Economics Research Unit (HERU),  
32  
33 School of Medicine and Dentistry, University of Aberdeen, Foresterhill, Aberdeen, AB25 2ZD  
34  
35

36  
37 **Correspondence to:** Ms Gillian Scanlan

38  
39 Email: r01gms15@abdn.ac.uk  
40  
41  
42  
43  
44  
45  
46  
47  
48  
49  
50  
51  
52  
53  
54  
55  
56  
57  
58  
59  
60

## Abstract

**Objectives:** Multiple personal and work-related factors influence medical trainee careers decision making. The relative value of these diverse factors is under-researched, yet this intelligence is crucially important for informing medical workforce planning, and retention and recruitment policies. Our aim was to investigate the relative value of UK doctors' preferences for different training post characteristics during the time period when they either apply for speciality or core training, or take time out.

**Methods:** We developed a discrete choice experiment (DCE) specifically for this population. The DCE was distributed to all second year Foundation Programme doctors (F2s) across Scotland as part of the National Career Destination Survey in June 2016. The main outcome measure was the monetary value of training-post characteristics, based on willingness to forgo additional potential income and willingness to accept extra income for a change in each job characteristic calculated from regression coefficients.

**Results:** 677/798 F2 doctors provided usable DCE responses. Location was the most influential characteristic of a training position, followed closely by supportive culture and then working conditions. F2 doctors would need to be compensated by an additional 45.75% above potential earnings to move from a post in a desirable location to one in an undesirable location. Doctors who applied for a training post placed less value on supportive culture and excellent working conditions than those who did not apply. F2 males valued Location and a supportive culture less than female F2s.

**Conclusion:** This is the first study focusing on the career decision making of UK doctors at a critical careers decision-making point. Both location and specific job-related attributes are highly valued by F2 doctors when deciding their future. This intelligence can inform workforce policy to focus their efforts in terms of making training posts attractive to this group of doctors to enhance recruitment and retention.

1  
2  
3 *Word count – 300*  
4

5 **Strengths and Limitations of this Study**  
6

- 7 • An important strength of this study is that it surveyed all Foundation Programme year two  
8 doctors in Scotland: that is, those at a critical point in medical careers decision making (i.e.  
9 the time of committing to specific speciality or core training programmes).  
10
- 11 • Survey responses were received from 84.8% of the eligible population of Foundation Year  
12 Two Doctors in Scotland (n=798).  
13
- 14 • Our sample was diverse and representative of the UK population of F2 doctors in terms of:  
15 gender, graduate application rates and those who applied vs did not apply for training.  
16
- 17 • Our Focus was on generic ‘push-pull’ factors rather than speciality choice (i.e. surgery or  
18 general practice). Thus, we could not investigate if there was an association between  
19 certain preferences and whether or not a respondent applied for speciality training, or for  
20 particular training programmes.  
21  
22  
23  
24  
25  
26  
27  
28  
29  
30  
31  
32  
33  
34  
35  
36  
37  
38  
39  
40  
41  
42  
43  
44  
45  
46  
47  
48  
49  
50  
51  
52  
53  
54  
55  
56  
57  
58  
59  
60

## **Introduction**

Accurately predicting medical workforce supply is increasingly challenging. Doctors no longer behave in time-recognised ways in terms of career decision making, and their behaviour no longer fits with service need<sup>1</sup>. For example, in the UK context, medical graduates are choosing not to progress through training as predicted. In 2016, nearly 50% of those graduates completing the Foundation Programme (the generic two-year training programme which bridges the gap between medical school and being eligible to apply for core, specialty or general practice) did not apply for core medical training or Specialty training (including General Practice) at the standard point in time<sup>2,3</sup>. Simply put, one in two of today's medical graduates left the training pipeline at the first natural break opportunity while keeping their options open (i.e. with full registration and eligibility to apply for higher training). Instead, they opted to take a break from training, often working overseas for a period of time<sup>4</sup>. Although working overseas has always been a popular option<sup>5</sup>, the difference nowadays is that at least one in twenty Foundation Programme (FP) doctors appear to leave the UK workforce for good<sup>6</sup>. Given this "brain drain", more understanding of what is important to the careers decision making of doctors as they enter their post-FP phase is crucial in order to identify how best to enhance the attractiveness of medical training, and thus ensure sufficient doctors to deliver service now and in the future<sup>7</sup>.

There is a wide literature examining the factors influencing medical student, trainee doctor and qualified healthcare professional workplace supply and career decision making factors. This literature highlights the influence of socio-demographic factors such as gender<sup>8-10</sup> and the importance of financial incentives<sup>11-14</sup>, professional and educational development<sup>14,15</sup>, geographical location<sup>11,16,17</sup>, work-life balance<sup>18,19</sup>, quality of life<sup>20,21</sup>, flexibility<sup>18,21,22</sup>, working conditions<sup>17,20,23,24</sup> and prior education<sup>25</sup> in medical careers decision making. Recent studies have provided some insight into Foundation doctors' preferences specifically. This research suggests that job-related factors, such as the level of support and satisfaction throughout the Foundation Programme impact on FP



1  
2  
3 doctor career decision making<sup>26,27,28</sup>. This information is important as it was previously assumed  
4 that medical careers preferences and values were formed prior to leaving medical school<sup>20,21,29</sup>. If  
5 this is not the case, it is crucial to identify the key attributes that play a crucial role in making training  
6 posts more attractive to those in the early stages of postgraduate training, as this intelligence may  
7 be used to inform interventions aimed at increasing the number of doctors staying in the training  
8 pipeline.  
9  
10  
11  
12  
13  
14  
15

16  
17 Senior doctors, medical trainee and senior student preferences for job characteristics<sup>17,30,31</sup> have  
18 progressed from relying on simple surveys<sup>32,33</sup> to using discrete choice experiments (DCEs) to identify  
19 the relative importance medical students and trainees place on different characteristics<sup>17,30</sup>.  
20  
21 However, to date, this approach has not been used specifically with F2 doctors although this is a  
22 group whose career-related decisions are crucial to the present and future delivery of care. Indeed,  
23 very little is known about the critical factors in F2 career decision making. The original UK DCE work  
24 of Cleland and colleagues did not allow for the identification of the most important attributes that  
25 are critical for Foundation year two (F2) doctors, while DCEs with junior doctors in other contexts  
26 have narrowly focussed upon specific careers preferences<sup>17,34-36-34</sup>.  
27  
28  
29  
30  
31  
32  
33  
34  
35  
36  
37

38 Thus, to address this gap in the literature, we developed a new DCE (see later) to assess the  
39 importance of different factors that make training posts more, or less, attractive to FY2 Doctors. Our  
40 ultimate aim in doing so was to investigate the relative value of F2 doctor's preferences for different  
41 training post characteristics at the time in which they either apply for core training, specialty training  
42 or take a break.  
43  
44  
45  
46  
47  
48  
49  
50  
51  
52  
53  
54  
55  
56  
57  
58  
59  
60

## **Methods**

This study used a quantitative technique, known as a DCE, to elicit training post preferences<sup>17,37</sup>. This technique presents respondents with a series of choices to be made between hypothetical training posts. Each post is presented as a bundle of key characteristics (such as geographical location, culture of working and learning environment, etc) where each bundle presents alternative levels of these characteristics (desirable or undesirable location, etc, see table 1). By selecting one hypothetical training post over another, respondents indicate their willingness to trade off these characteristics and in doing so the relative importance of the characteristics can be measured. Thus, the DCE approach can measure how willing an individual is to substitute one attribute for another<sup>31</sup> (e.g. being very familiar with a speciality over poorer working conditions). These trade-offs can be converted into willingness-to-pay (WTP) values when a monetary attribute is included in the DCE<sup>37,38</sup>.

## **Context**

In the UK, medical students spend between 4-6 years at medical school. On graduation, over 98% of medical students apply for the Foundation Programme (FP). This is a generic two-year training programme which bridges the gap between medical school and specialty training. FP doctors mostly undertake six four-month rotations, with regular assessments and milestones. At the end of the F1 year, trainees obtain full registration with the regulator (GMC). Satisfactory completion of F2 makes them eligible to apply for further specialty specific training including core and general practice. In November of their second year, during their fourth rotation, F2 doctors can apply for the next stage of their postgraduate training through a national recruitment and selection process. The specialty training programmes recognised by the General Medical Council (GMC) last between 3 – 8 years and at the end of training, doctors are awarded the certificate of completion of training (CCT) which allows them to work as a consultant or GP in that specialty.

### Development of the discrete choice experiment (DCE)

Following guidelines<sup>39</sup> we used qualitative methods to generate the characteristics (e.g., working conditions) and levels (e.g., desirable, undesirable) presented within the hypothetical training posts, and to ensure that both these and the language used were clear, sensible, and meaningful to the respondents. We first consulted the international literature on medical labour markets and careers decision making to identify which attributes might be relevant. However, as little of the literature was drawn from our target population of post-registration, pre-specialty training doctors were needed to bridge this evidence gap to refine the content and choice of attributes. To find out more about what was important to this group, we carried out two focus groups and 21 individual interviews with Foundation Doctors drawn from two contrasting Scottish regions between December 2015 and April 2016. These regions were chosen as they are diverse in terms of size and geographical locality, and because local data indicated that they attract a different groups of FP doctors in terms of home origin and medical school attended. Using a semi-structured interview schedule, we gathered data about the key characteristics considered when applying for training posts.

This two-stage methodology identified five characteristics of training positions that were likely to be major drivers of Foundation Year 2 (F2) doctors in their medical careers decision-making behaviour and specifically their progression into the specialty training phase (see Table 1). These were the culture of the working and learning environment, opportunities in professional development and the familiarity with the Specialty (see Table 1). Two further characteristics coincided with those identified previously and used within a DCE for medical trainees in general: that is working conditions and geographical location<sup>17</sup>. The levels attached to each of these characteristics were informed by the existing literature, the qualitative data and the expert knowledge of the research team. The resulting DCE was piloted with 31 F2 doctors who provided feedback on the range and

1  
2  
3 wording of the attributes and levels. This piloting also allowed us to test the face validity of the DCE  
4  
5 questionnaire. No major changes were deemed necessary based on the pilot.  
6  
7

8  
9 Potential earnings were not identified in the qualitative work as a potential motivator of F2 doctors'  
10  
11 decisions, but we still decided to include this characteristic in the DCE attribute to allow for  
12  
13 computation of willing-to-pay (WTP) values. WTP values correspond to trade-offs between changes  
14  
15 in potential earnings and the other post characteristics (e.g., how large pay increase should be to  
16  
17 compensate F2 doctors for a deterioration in working conditions). These WTP values can be used to  
18  
19 identify the most valued characteristics (i.e., those with the largest impact on F2 doctors' decisions).  
20  
21

22  
23  
24 ----- **Table 1 about here** -----  
25

26  
27  
28 The survey explained the DCE task and described each attribute and its levels before the tasks were  
29  
30 presented. In each task, the F2s doctors were asked to choose their preferred training position  
31  
32 between two available (see Figure 1).  
33  
34

35  
36 The training positions were presented in 13 choice sets, each containing two hypothetical training  
37  
38 positions. These choice sets were generated through NGENE<sup>40</sup>, a statistical software package for  
39  
40 designing choice experiments. A D-efficient design with null priors was generated with 12 choice sets  
41  
42 to investigate the main effects of changes in the training position's characteristics on respondents'  
43  
44 choices<sup>41</sup>. In addition, one choice set was repeated (task #13) to check for choice consistency (i.e.  
45  
46 whether the respondents answered consistently to a repeated choice set task. All choice sets were  
47  
48 randomised and computed into 12 choice sets, this prevented repetition of a choice task.  
49  
50

51  
52  
53 ----- **Figure 1 about here** -----  
54  
55

### Sample and Data Collection

The DCE was incorporated into the National F2 Career Destination Survey 2016<sup>4</sup> within Scotland. This e-survey collects data on the career destinations of F2 doctors as near as practicable to completion of their foundation training and so was considered an apt vehicle for our DCE. The Destination Survey was sent to all Scottish F2 doctors due to complete FP2 in August 2016) (n=798) in June 2016, and closed in August 2016. Two reminder emails were sent during this time. No formal sample size calculation was undertaken as we surveyed the whole population of FP2 doctors in Scotland. Note that for the DCE a minimum of only 35 respondents was needed to estimate sample preferences for job post.

### Preference analysis

We modelled the probability that the training position is selected as a function of the characteristics and levels being offered within that particular choice set. This can be represented via a multinomial logit model (MNL)<sup>42</sup> with the underlying utility ( $V_{ntj}$ ) obtained through the characteristics of the training positions presented by the following:  $V = b.X + e$ , where  $e$  is an error term which is independently and identically distributed as type 1 extreme value.

$$V_{ntj} = \alpha + \beta_1 \text{Geographical Locality: Desirable} + \beta_2 \text{Familiarity with Speciality: Unfamiliar} + \beta_3 \text{Familiarity With Speciality: Quite Familiar} + \beta_4 \text{Culture of Working and learning Environment: Supportive} + \beta_5 \text{Working Conditions: Excellent} + \beta_6 \text{Working Conditions: Good} + \beta_7 \text{Opportunities in Professional Development: Excellent} + \beta_8 \text{Opportunities in Professional Development: Average} + \beta_9 \text{Potential Earnings. (1)}$$

The analysis of the five qualitative characteristics (i.e., geographical locality, familiarity with speciality, culture of working and learning environment, working conditions, and opportunities for professional development) was analysed on STATA and are entered in the model as dummy coded

1  
2  
3 variables and their effects on respondents' choices are captured by the ( $\beta_1$ ) to ( $\beta_8$ ) coefficients,  
4  
5 which represent F2 doctors' preferences for the training position characteristics. The parameter ( $\beta_9$ )  
6  
7 measures the influence of a 1-unit change in the earnings characteristic on respondents' choices. ( $\alpha$ )  
8  
9 is the model intercept. For the ( $\beta$ ) parameters, a positive estimate would indicate that an increase in  
10  
11 the corresponding characteristic would make the job position more desirable and thus more likely to  
12  
13 be selected by the trainees. For example, a positive estimate for ( $\beta_1$ ) would indicate that a shift from  
14  
15 "undesirable" to "desirable" geographical location makes a training position more attractive. To  
16  
17 locate these preference estimates on a more meaningful (or easier to interpret) scale, we compute  
18  
19 WTP values as the ratio of preferences for each training position characteristic ( $\beta_1$ :  $\beta_8$ ) and potential  
20  
21 earnings ( $\beta_9$ ). We used the delta approach on STATA to calculate the WTP confidence intervals.  
22  
23 These WTP values indicate how much the respondents would be willing to pay to improve the job  
24  
25 characteristic (or should be compensated for a deterioration in the characteristic) (e.g., how much  
26  
27 financial income would need offered to compensate a trainee for a position offering an  
28  
29 "undesirable" location rather than a "desirable" location). This in turn allows us to directly state the  
30  
31 relative importance of the characteristics in the career decision making.  
32  
33  
34  
35

### 36 **Preferences heterogeneity analysis**

37  
38 The analysis above provides an estimate of the preferences for the average respondent within our  
39  
40 sample. We therefore further explored whether preferences for training post characteristics vary by  
41  
42 specific personal characteristics. Following the literature on career decision making of junior doctors,  
43  
44 we considered the impact of the following variables:  
45

- 46  
47 • Graduate Entrant on entering Medical School (Graduate VS Non-Graduate)<sup>25</sup>
- 48  
49 • Gender (Male Vs Female)<sup>8-10</sup>
- 50  
51 • Country of Origin (Scotland, Rest of the World VS R/UK)<sup>16,18</sup>
- 52  
53 • Application for Further Training (Application Made Vs No Application)<sup>1-6</sup>
- 54  
55
- 56  
57
- 58  
59

1  
2  
3 To assess the variability in F2 choices we included interaction terms of these personal characteristics  
4 with the training post characteristics. Given the positive signs on the main effects a statistically  
5 significant interaction effect (along with its accompanying sign) will indicate whether that particular  
6 personal characteristic is associated with an increased (positive sign) or reduced (negative sign)  
7 strength of preference for the training post characteristic. However, this strategy would lead to a  
8 model with a relatively large number of parameters (i.e., each of the nine preference parameters ( $\beta$ )  
9 can be interacted with the five personal characteristics parameters, leading thus to 45 interaction  
10 effects, for a total of 55 model parameters). Thus, for ease of reporting and interpretation, we used  
11 stepwise regression to identify the most relevant interaction effects and specify a more  
12 parsimonious choice model. All personal characteristics with a non-significant result using a  
13 significance level of 20% (P-value < 0.2) were removed in the final conditional logistic regression  
14 model analysis.  
15  
16  
17  
18  
19  
20  
21  
22  
23  
24  
25  
26  
27  
28  
29

### 30 **Ethics**

31  
32 Ethical approval was granted for all components of this work by the College of Life Sciences and  
33 Medicine Ethical Research Board (CERB), University of Aberdeen, and the study was also approved  
34 by NHS Research Scotland (NHS R&D).  
35  
36  
37  
38  
39  
40  
41  
42  
43  
44  
45  
46  
47  
48  
49  
50  
51  
52  
53  
54  
55  
56  
57  
58  
59  
60

## **Results**

The DCE was answered by 677/798 F2 doctors, giving an 84.8% response rate. Of these, 58.6% (n=397) were female, 40% (n=271) male, with 9 not indicating their gender. 74.6% (n=505) had graduated from medical school in Scotland, 20.8% (n=141) graduated elsewhere in the UK, and 4.1% (n=28) graduated outside the UK. Three participants did not indicate where they graduated and were classified as missing data. 60.3% (n=408) were Scottish born, 24.8% (n=168) born elsewhere in the UK, and the others from outside the UK (14.9% [n=101]). 78.6% (n=532) had gone to medical school as undergraduates and 21.4% (n=145) as graduate entrants. 54.7% (n=370) applied for speciality/core/GP training and 45.3% (n=307) did not apply for any training.

We removed 6 respondents because of issues on DCE data: One trainee did not complete the DCE questions, 5 trainees answered serially for each question (e.g. they systematically answered choice 1 (or choice 2) in the DCE tasks) or answered differently to a repeated choice task providing thus no information about their preferences for position characteristics. This represents an 84.1% usable response rate.

## **Main effect Model for Logistical Regression Analysis**

Results can be found in Table 2. The statistical significance of at least one level of each characteristic indicates that all key characteristics identified in the DCE design stage played a significant role in the choice of training position. Moreover, the positive coefficients indicate that an improvement in the characteristic was associated with an increased preference for a training post. On average F2 doctors prefer a familiar training position with a more desirable location, which offers a supportive working culture, better working conditions and opportunities for professional development.



### WTP analysis

The willingness-to-pay (WTP) values along with their confidence intervals are displayed in the last column of Table 2. For F2s to accept a training position with an undesirable rather than a desirable geographical location, the expected potential earnings should be increased by 45.74%. This is the largest estimated WTP value, indicating thus that a move from a desirable to an undesirable location would be the main driver of F2 doctors' choices.

Additionally, supportive culture was also found to be highly valued by F2 trainees. The respondents valued the move from a supportive working environment at 40.02% above average expected earnings. Thus, a training post that offers an unsupportive culture for trainee doctors must offer a compensation of just over 40% above average potential earnings, before it will be considered attractive training.

The working conditions attribute was also highly valued by F2 doctors who valued the move from excellent to poor working conditions as equivalent to 38.54% of their annual potential income. However, within this attribute the move from good working conditions to poor working conditions provides the higher value (equivalent to 29% of their annual potential income). The additional move from good to excellent working conditions only provided the equivalent of an additional 9.5% increase in annual potential income.

Furthermore, F2s valued a move from a training post with average opportunities in professional development (CPD) to a training post that offered excellent CPD more highly than a move from poor to average CPD opportunities. The move from poor to excellent professional development was valued at 31% of average expected earnings. Whereas a move from average to poor opportunities in professional development was valued at 12.8% of average expected earnings.

1  
2  
3 Additionally, F2s valued working in a very familiar speciality more highly than a quite familiar  
4 speciality. A move from a very familiar speciality to an unfamiliar speciality would need to be  
5 compensated more than 18%, with this mostly explained by the finding that a move from a quite  
6 familiar speciality to an unfamiliar one would need to be compensated by more than 14%.  
7  
8  
9  
10

### 11 12 13 **Preferences heterogeneity analysis**

14  
15 We investigated how F2 doctors' personal characteristics may affect their training post preferences.  
16 The results are reported in Table 3. Note that the number of observations in this final model are  
17 lower than in the previous model because nine respondents with missing values on their personal  
18 characteristics had to be removed from the analysis.  
19  
20  
21  
22  
23  
24  
25

26 ..... **Table 3 around here** .....  
27  
28  
29

30 Nine interaction effects reached significance at the 95% confidence level. The results indicate that  
31 males value a desirable location and supportive culture less than female trainees as indicated by the  
32 negative signs on the relevant interaction terms. F2 doctors born outside the UK value a desirable  
33 location less than F2 doctors from the rest of the UK (excluding Scotland). Graduate entrant trainees  
34 place less value on a desirable location, supportive culture and excellent opportunities in  
35 professional development than F2 who were non-graduates on applying for medical school. F2  
36 doctors who stated that they had applied for speciality, core or GP training placed significantly less  
37 value on a supportive culture and excellent working conditions than those who did not apply for  
38 continued training after F2. However, those that did apply valued a quite familiar speciality more  
39 than those who did not apply.  
40  
41  
42  
43  
44  
45  
46  
47  
48  
49  
50  
51  
52  
53  
54  
55  
56  
57  
58  
59  
60

## **Discussion**

To the best of our knowledge, this is the first study focusing solely Foundation Year 2 doctors' career decision making and the first that assesses not just the value F2 doctors place on attributes of a training post but also the relative strength of these preferences. We found that all training post attributes in the model influenced the choices of our respondents. However, one attribute stood out as being most valued: desirability of geographical location. F2 doctors were willing to trade up to 45% of their average expected earnings to have a training post which was in a desirable location (defined as offering amenities and proximity to family and friends) compared to undesirable location. While this attribute could arguably be said to have little to do with the nature of the post as such, attributes that were more directly job-related were also very highly valued. For example, F2 doctors were willing to trade around 40% of their average expected earnings to have a training post with a supportive culture compared to one with an unsupportive culture, and just over 38% of their average expected earnings to move from excellent working conditions to poor. These valuations were strongest between poor and good, compared to good and excellent. This is in line with previous UK research that highlighted that the change most valued for medical students and trainee doctors was from poor to good working conditions<sup>17,30</sup>.

We found relatively few significant interactions between F2 doctor characteristics and preferences, suggesting that, although our sample was heterogeneous in terms of gender, ethnicity, origin, graduate entrants, non-graduate entrants to medical school, they were remarkably homogenous in terms of the factors they value in a medical career. The few differences related to F2 characteristics indicated, first, females value a desirable location and supportive working and learning culture more than their male counterparts. Differences between male and female medical students and doctors for job-related preferences are well established<sup>8,9,18</sup>. Typically, women have tended to prioritise work-life balance more than men. We found that factors which could loosely be related to this

1  
2  
3 (desirable location, supportive environment) were more important to women – but they were also  
4 important to our male respondents, just a little less so. This suggests that traditional gender  
5 differences in medicine are shifting, and previous marked differences between men and women may  
6 not be so apparent in the current generation.  
7  
8  
9

10  
11  
12  
13 Second, those who entered medicine as graduates placed less value on a desirable location and  
14 supportive culture than those who entered medical school as school leavers. Similar findings were  
15 found by Cleland et al. (2017). The methodology of our study means we cannot identify why this is  
16 the case, but drawing on other research, this may be associated with the need to get a job/training  
17 post without delay due to level of debt<sup>43,44</sup> or greater family responsibilities<sup>45</sup>. Or, alternatively, it  
18 could be that this group are more confident of their abilities and less reliant on support from work  
19 colleagues than their school leaver equivalents<sup>46,47</sup>. Future qualitative research is needed to gain  
20 further insight.  
21  
22  
23  
24  
25  
26  
27  
28  
29  
30

31  
32 Data shows that 50% of graduates completing the foundation programme did not apply for speciality  
33 training or core training<sup>4</sup>. Our study shows that F2 doctors who applied for training placed  
34 significantly less value on excellent working conditions and a supportive culture than those who did  
35 not do so. Again, we do not know the reasons for this, but it merits further investigation, perhaps  
36 using qualitative methodologies to explore differences in personal characteristics such as self-  
37 efficacy<sup>48,49</sup>, experience of social support from senior staff and co-workers<sup>48,50</sup>, and/or prior  
38 experience<sup>10</sup>. Anecdotal evidence suggests that some trainees are reluctant to apply for further  
39 training until they have gained additional experience and because once they have committed to a  
40 speciality (or training programme), career changes are difficult. This is acknowledged in the medical  
41 literature: a recent report by the GMC argues that more flexibility is needed in training to  
42 acknowledge prior learning and allow trainees to transition between specialities with more ease<sup>51</sup>.  
43  
44  
45  
46  
47  
48  
49  
50  
51  
52  
53  
54  
55  
56  
57  
58  
59  
60

1  
2  
3 Increasing flexibility in this way may well help recruitment but our study shows that good working  
4  
5 conditions and a supportive culture are also of great importance to trainees.  
6  
7

8  
9 For those doctors who did apply for core/higher/GP training in their F2 year, being quite familiar  
10  
11 with a specialty was highly valued. This makes intuitive sense: committing to training can be seen as  
12  
13 committing to a very specific medical career. Knowing a little about the specialty and the nature of  
14  
15 the work seems a reasonable prerequisite for making such a decision. This reinforces the importance  
16  
17 of giving medical students and trainees a wide range of experiences, in order to encourage trainees  
18  
19 into the breadth of specialities.  
20  
21

22  
23  
24 The location of a job will be known prior to accepting a training post. However, it may not be  
25  
26 reasonable to assume that doctors will be able to determine other variables in advance. For  
27  
28 example, they may not be able to assess the level of support in their new workplace, or have a  
29  
30 detailed knowledge of the staffing levels or career development opportunities. However, given  
31  
32 emerging evidence indicates that experiences during the Foundation Programme are influential in  
33  
34 early career decision making, it is perhaps timely to consider a critical evaluation of this programme.  
35  
36

37  
38  
39 An important strength of this study is that it surveyed all F2 doctors in Scotland: that is, those at a  
40  
41 critical point in medical careers decision making, the traditional time of committing to training in a  
42  
43 specific specialty. Our focus was generic “push-pull” factors<sup>52</sup> rather than specialty choice (e.g., a  
44  
45 preference for surgery or general practice), so we could not investigate possible links between these  
46  
47 preferences and specialty preferences. This means that we could not compare if compensation  
48  
49 values varied between those whose preference was to apply for one specialty rather than another,  
50  
51 and/or for a popular specialty versus a less competitive specialty. However, this generic focus  
52  
53 allowed us to pull out differences between those who did, and did not, apply for core training or  
54  
55  
56  
57  
58  
59  
60

1  
2  
3 specialty training, during F2. Future research could look at the association between particular  
4 preferences (e.g., for work-life balance) and specialty choice.  
5  
6  
7

8  
9 There are approximately 8,000 F2 doctors in the UK at any one point in time, of whom about 10%  
10 are based in Scotland. Our sample was diverse and representative of the UK population of F2 doctors  
11 in terms of: gender, graduate application rates and those who applied vs did not apply for training<sup>4</sup>.  
12  
13 In our DCE most graduated in Scotland and were born in Scotland, this statistic is something that  
14 may differ from the rest of the UK. However, Cleland et al. (2016) did not find any statistical  
15 significance in the preference choices between trainees from different regions of the UK. While our  
16 opt-out clause was explicit, and selected by a proportion of potential respondents, our survey  
17 escaped the usual response to an e-survey request, that of automatic deletion. The study was  
18 carried out after the national application and selection process for core, specialty or GP training was  
19 almost complete and at the completion of foundation training. Our participants had thus been  
20 thinking about their future medical career in the previous months, so the timing of our DCE was  
21 good. An interesting area for future research may be to access specialty training applications to  
22 compare the DCE responses with trainees' actual careers-related behaviour.  
23  
24  
25  
26  
27  
28  
29  
30  
31  
32  
33  
34  
35  
36  
37

38 As mentioned previously, the DCE methodology has been used in other contexts with those in the  
39 early stages of medical training. Work from Australia, using a study-specific DCE, found that doctors  
40 in their first three years of hospital medicine training post-graduation were willing to sacrifice up to  
41 50% of their expected income to control their time on call (the MABEL study<sup>34</sup>). The same  
42 programme of work also looked at how to attract GPs in Australia into rural posts, identifying the  
43 monetary value doctors placed on staying in post compared to moving to a different location<sup>36</sup>. The  
44 only other DCE we have identified utilised medical students in Norway, again focusing on GP  
45 recruitment<sup>53</sup>. This identified that the opportunity to control working hours and opportunities in  
46 professional advancement lead to a higher probability of medical students considering a move to a  
47  
48  
49  
50  
51  
52  
53  
54  
55  
56  
57  
58  
59  
60

1  
2  
3 rural location when they were fully qualified<sup>53</sup>. While it is difficult to compare across different DCE  
4  
5 studies because of the bespoke nature of DCEs, there seem to be some common denominators in  
6  
7 terms of what could broadly be termed working conditions. The arguably non-work-related factor of  
8  
9 location may also have been important in the MABEL and Norwegian studies: we cannot tell if this  
10  
11 was the case as in both studies the DCE attributes focused only on work-related factors (more  
12  
13 general factors such as location near friends and family were not incorporated). It may be that some  
14  
15 factors are country-specific but only cross-context studies will provide this insight.  
16  
17

18  
19 This is the first study that focusses on the career decision making of UK doctors at a critical career  
20  
21 decision making point, that of applying, or not, for core medical training or specialty training. We  
22  
23 have identified that both location and specific job-related attributes are highly valued by junior  
24  
25 doctors when making careers decisions. Location is not something that can change. However, a  
26  
27 supportive working and learning culture is something that a healthcare organisation has the power  
28  
29 to change from within. Focusing on providing a supportive working environment is something that  
30  
31 may help attract and retain medical trainees. In other words, meeting the needs of F2 doctors may  
32  
33 help to strengthen the level of commitment doctors in training have towards the NHS<sup>54</sup>, help with  
34  
35 retention of this group of doctors and hence meet immediate and future service delivery needs.  
36  
37  
38  
39  
40  
41  
42  
43  
44  
45  
46  
47  
48  
49  
50  
51  
52  
53  
54  
55  
56  
57  
58  
59  
60

### Contributions

JC, PJ and KW had the original idea for this project and obtained the funding for GS's doctorate. The development of the DCE was led by GS in collaboration with JC, PJ, KW and DS. GS prepared the ethics application. GS lead on the literature review. DS and NK supervised the analysis, which was carried out by GS. JC, PJ and KW contributed throughout the analysis of the DCE. GS drafted the paper guidance from DS and NK for the methods, analysis and results sections, with JC revising drafts. All authors contributed to the final paper. The study is guaranteed by the University of Aberdeen.

### Collaborator Statement

This project is in collaboration with NHS Education for Scotland.

### Ethical permission

Ethical permission was granted for this study from the University of Aberdeen College of Life Sciences and Medicine Ethics Research Board (CERB/2015/12/1269, approval granted 22/04/16).

### Funding

Our thanks go to NHS Education for Scotland for funding this programme of work.

### Competing Interests

There are no competing interests in this study

### Data Sharing

All available data can be obtained by contacting the corresponding author (Gillian Scanlan).

### Acknowledgements

Our thanks to all those who participated in developing and piloting the DCE and completing the survey. With thanks to NHS Education Scotland for merging the DCE onto the destination survey.



## References

1. Arthur MB, Khapova SN, & Wilderom CPM. Career success in boundaryless world. *J Organ behave.* 2005;26, 177-202.
2. Rimmer A. Nearly half of trainees chose not to progress straight into specialty training in 2015. *BMJ careers.*  
[http://careers.bmj.com/careers/advice/Nearly\\_half\\_of\\_trainees\\_chose\\_not\\_to\\_progress\\_straight\\_to\\_specialty\\_training\\_in\\_2015](http://careers.bmj.com/careers/advice/Nearly_half_of_trainees_chose_not_to_progress_straight_to_specialty_training_in_2015) (Accessed 8th of March 2016).
3. UK foundation Programme Office. F2 Career Destination Report 2015.  
<http://www.foundationprogramme.nhs.uk/pages/home/keydocs> (Accessed 5th of March, 2016).
4. UKFPO CAREER DESTINATION REPORT 2016  
[www.foundationprogramme.nhs.uk/download.asp?file=Careers\\_destination\\_2016.pdf](http://www.foundationprogramme.nhs.uk/download.asp?file=Careers_destination_2016.pdf)  
(accessed 8<sup>th</sup> of March 2017)
5. Smith C, Low L. The gap between foundation years and specialty training. *BMJ Careers* 21st February 2012. <http://careers.bmj.com/careers/advice/view-article.html?id=20006722>.  
(Accessed 5<sup>th</sup> of November 2016)
6. General Medical Council. Interactive reports to investigate factors that affect progression of doctors in training.  
[http://www.gmcuk.org/Briefing\\_note\\_Exams\\_and\\_recruitment\\_outcome\\_reports.pdf\\_6006997.pdf\\_60086828.pdf](http://www.gmcuk.org/Briefing_note_Exams_and_recruitment_outcome_reports.pdf_6006997.pdf_60086828.pdf) (Accessed on the 16th of May 2016)
7. Collins A, Young R. (eds.) *The Future of Career.* Cambridge: Cambridge University Press; 2000.

- 1
- 2
- 3 8. Riska E. Gender and Medical Careers. *Maturitas*. 2011; 68 (3), 264-267.
- 4
- 5
- 6 9. Behrend TS, Thompson LF, Meade AW, Grayson MS, Newton DA. Gender Differences in
- 7 Career Choice Influences. *Industrial and Organisational Psychology*. 22nd Annual Meeting,
- 8 New York. 2007.
- 9
- 10
- 11
- 12 10. Pianosi K, Bethune C, Hurley KF. Medical student career choice: a qualitative study of fourth-
- 13 year medical students at Memorial University, Newfoundland. *CMAJ Open*. 2016; 4 (2).
- 14
- 15
- 16
- 17 11. Viscomi M, Larkins S, Gupta TS. Recruitment and retention of general practitioners in rural
- 18 Canada and Australia: a review of the literature. *Can J Rural Med*. 2013;18:13–23.
- 19
- 20
- 21
- 22 12. New Zealand Ministry of Health. Voluntary Bonding Scheme; 2012.
- 23 <http://www.health.govt.nz/our-work/health-workforce/voluntary-bonding-scheme>
- 24 (Accessed 3rd March 2017).
- 25
- 26
- 27
- 28
- 29 13. Pathman DE, Konrad TR, King TS, Taylor DH, Koch GG. Outcomes of states' scholarship, loan
- 30 repayment, and related programs for physicians. *Med Care*. 2004;42:560–8.
- 31
- 32
- 33
- 34 14. Rao KD, Ryan M, Shroff Z, Vujicic M, Ramani, S. Rural Clinician Scarcity and Job Preferences
- 35 of Doctors and Nurses in India: A Discrete Choice Experiment. *PLoS ONE*. 2013; 8 (12).
- 36
- 37
- 38
- 39 15. Takemura T, Kielmann K, Blaauw, D. (2016). Job Preferences among clinical officers in public
- 40 sector facilities in rural Kenya: a discrete choice experiment. *Human Resources for Health*.
- 41 2016; 14 (1).
- 42
- 43
- 44
- 45 16. Verma P, Ford J.A, Stuart A, Howe, A, Everington S, Steel N. A systematic review of
- 46 strategies to recruit and retain primary care doctors. *BMC Health Services*. 2016;16, 126.
- 47
- 48
- 49
- 50 17. Cleland J, Johnston PW, Watson V, Krucien, N, Skatun D. What do UK doctors in training
- 51 value in a post? A discrete choice experiment. *Med Educ*. 2016; 50: 189-202.
- 52
- 53
- 54
- 55
- 56
- 57
- 58
- 59
- 60

18. Gibis B, Heinz A, Jacob R & Muller CH. The Career Expectations of Medical Students: findings from a Nationwide Survey in Germany. *Dtsch Arztebl Inter.* 2012; 109 (18), 327-332.
19. Rich A, Viney R, Needleman S, Griffin A, Woolf K. You can't be a person and a doctor': the work-life balance of doctors in training- a qualitative study. *BMJ Open.* 2016; 6 :e013897
20. Cleland J, Johnston PW, French FH, Needham G. Associations between medical school and career preferences in Year 1 medical students in Scotland. *Med Educ.* 2012. 46 (5), 473-484.
21. Cleland JA, Johnston PW, Anthony M, Khan N, Scott NW. A survey of factors influencing career preference in new-entrant and exiting medical students from four UK medical schools. *BMC Med Educ.* 2014; 14, 151.
22. Williams C, Cantillon P. A surgical career? The views of junior women doctors. *Medical Educ.* 2001; 34 (8), 602-607.
23. Taylor KS, Lambert TW, Goldacre ML. Career progression and destinations, comparing men and women in the NHS: postal questionnaire survey. *BMJ.* 2009; 33, 1735.
24. Boyle E, Healy D, Hill ADK, O'Connell PRO, Kerin M et al. Career choices of today's medical students: where does surgery rank? *Irish J of Med Sci.* 2013; 182, 337-343.
25. Svirko E, Lambert T, Goldacre MJ. Gender, ethnicity and graduate status, and junior doctors' self-reported preparedness for clinical practice: national questionnaire surveys. *J Roy Soc Med.* 2014;107 (2), 66-74.
26. Smith F, Lambert TW, Goldacre MJ . Demographic characteristics of doctors who intend to follow clinical academic careers: UK national surveys 2014.
27. Brennan N, Corrigan O, Allard J, Arche J., et al. The transition from medical student to junior doctor: today's experiences of Tomorrow's Doctors. *Med Educ.* 2010; 44 (5), 449-458.

- 1  
2  
3 28. Spooner S, Gibson J, Rigby D, Sutton M, Pearson E, Checkland K. Stick or Twist? Career  
4  
5 decision-making during contractual uncertainty for NHS Junior Doctors. *BMJ Open*. 2017;7:  
6  
7 e013756.  
8  
9
- 10 29. Watmough S, Taylor D, Ryland I. Using questionnaires to determine whether medical  
11  
12 graduates' career choice is determined by undergraduate or postgraduate experiences. *Med*  
13  
14 *Teach*. 2007; 29 (8), 830-832.  
15
- 16 30. Cleland JA, Johnston P, Watson V, Krucien, N, Skatun D. (2017). What do UK medical  
17  
18 students value most in their career? A discrete choice experiment. *Med Educ*. 2017;  
19  
20 doi:10.1111/medu.13257.  
21  
22
- 23 31. Ubach C, Scott A, French F, Awramenko M, Needham G. What do hospital consultants value  
24  
25 about their jobs? A discrete choice experiment, *BMJ*. 2003; 326: 1432.  
26  
27
- 28 32. Lachish S, Goldacre MJ, Lambert T. Associations between institutional support, job  
29  
30 enjoyment, and attitudes to work in first-year doctors in the UK: national questionnaire  
31  
32 survey. *BMC Med Educ*. 2016; 16:151.  
33  
34
- 35 33. Lambert TW, Goldacre MJ, Evans J. Views of junior doctors about their work: survey of  
36  
37 qualifiers of 1993 and 1996 from United Kingdom medical schools. *Med Educ*. 2000; 34, 348-  
38  
39 354.  
40  
41
- 42 34. Sivey P, Scott A, Witt J, Joyce C, Humphreys J. Junior doctors' preferences for specialty  
43  
44 choice. *J Health Economics*. 2012; 31 (6), 813-823.  
45  
46
- 47 35. Sivey P, Scott A, Witt J, Joyce C, Humphreys J. Why Junior Doctors Don't Want to Become  
48  
49 General Practitioners: A Discrete Choice Experiment from the MAYBEI Longitudinal study of  
50  
51 Doctors. Melbourne Institute Working Paper. 2010; 17/10.  
52  
53  
54  
55  
56  
57  
58  
59  
60

- 1  
2  
3 36. Scott A, Witt J, Humphreys J, Joyce C, Kalb G, Jeon SH, McGrail M. Getting doctors into the  
4 bush: General Practitioners' preferences for rural location. *J Social Science and Medicine*.  
5 2013; 96, 33-44.  
6  
7  
8  
9  
10 37. Ryan M, Gerard K, Amaya-Amaya M. Using Discrete choice experiments to value health and  
11 Health care, Vol.11. Dordrecht, The Netherlands: Springer 2008.  
12  
13  
14 38. Ryan, M, Gerard K, Currie G. Using Discrete Choice Experiments in Health Economics. In: The  
15 Elgar Companion to Health Economics. Jones, A.M. (ed). Edward Elgar. 2012.  
16  
17  
18  
19 39. Klotjgaard M, Bech M, Sogaard R. Designing a stated choice experiment: The value of a  
20 qualitative process. *J of Choice Model*. 2012;5: 1-18.  
21  
22  
23  
24 40. Ngene 1.1.2 USER MANUAL & REFERENCE GUIDE. The Cutting Edge in Experimental Design.  
25 2014  
26  
27  
28  
29 41. Johnson FR, Lancsar E, Marshall, D, et al. Constructing experimental designs for discrete-  
30 choice experiments: Report of the ISPOR conjoint analysis experimental design good  
31 research practices task force. *Value Health* 2013; 16:3-13.  
32  
33  
34  
35  
36 42. McFadden D. "Conditional Logit Analysis of Qualitative Choice Behavior." In *Frontier in*  
37 *Econometrics*, 105–42. New York: Academic Press. 1974  
38  
39  
40  
41 43. First Year Medical Students Finance Survey. BMA [https://www.bma.org.uk/-](https://www.bma.org.uk/-/media/files/pdfs/working%20for%20change/shaping%20healthcare/firstyearstudentfinance%20report2012and2013.pdf?la=en)  
42 [/media/files/pdfs/working%20for%20change/shaping%20healthcare/firstyearstudentfinanc](https://www.bma.org.uk/-/media/files/pdfs/working%20for%20change/shaping%20healthcare/firstyearstudentfinance%20report2012and2013.pdf?la=en)  
43 [ereport2012and2013.pdf?la=en](https://www.bma.org.uk/-/media/files/pdfs/working%20for%20change/shaping%20healthcare/firstyearstudentfinance%20report2012and2013.pdf?la=en). (Accessed 8th of March 2016).  
44  
45  
46  
47  
48 44. Grayson MS, Newton DA, Thompson LF. Payback time: the associations of debt and income  
49 with medical student career choice. *Med Educ*. 2012; 46, 983-991.  
50  
51  
52  
53 45. Yvette P, Ben-Shlomo Y. Older doctors and progression through specialty training in the UK:  
54 a cohort analysis of General Medical Council data. *BMJ Open*. 2015; 5:e005658.  
55  
56  
57  
58  
59  
60

- 1  
2  
3 46. Madden L, Mathias BD, Madden TM. In good company. The impact of perceived  
4 organizational support and positive relationships at work on turnover intentions. J  
5 Management Research Review. 2015;38 (3).  
6  
7  
8  
9  
10 47. Lunenburg FC. Self-Efficacy in the Workplace: Implications for Motivation and Performance.  
11 Inter J of Management, Business, and Administration. 2011; 14,1.  
12  
13  
14 48. Chou P. The Effects of Workplace Social Support on Employee's Subjective Well-being. Euro J  
15 of Business and Management. 2015; 7 (6).  
16  
17  
18  
19 49. Bandura A. Cultivate self-efficacy for personal and organizational effectiveness. Oxford:  
20 Blackwell. 2000  
21  
22  
23  
24 50. Judge TA, Erez A, Bono JE, Thoresen C J. "Are Measures of Self-Esteem, Neuroticism, Locus of  
25 Control, and Generalized Self-Efficacy Indicators of a Common Core Construct?", J  
26 Personality and Social Psychology. 2002; 83(3), 693-710.  
27  
28  
29  
30  
31 51. The GMC. Adapting for the future: a plan for improving the flexibility of UK postgraduate  
32 medical training.  
33  
34  
35 [https://www.gmcuk.org/Adapting\\_for\\_the\\_future\\_\\_\\_a\\_plan\\_for\\_improving\\_the\\_flexibility\\_](https://www.gmcuk.org/Adapting_for_the_future___a_plan_for_improving_the_flexibility_of_UK_postgraduate_medical_training_FINAL.pdf_69842348.pdf)  
36 [of\\_UK\\_postgraduate\\_medical\\_training\\_FINAL.pdf\\_69842348.pdf](https://www.gmcuk.org/Adapting_for_the_future___a_plan_for_improving_the_flexibility_of_UK_postgraduate_medical_training_FINAL.pdf_69842348.pdf) (Accessed 25th of  
37  
38  
39  
40  
41  
42  
43  
44  
45  
46  
47  
48  
49  
50  
51  
52  
53  
54  
55  
56  
57  
58  
59  
60

1  
2  
3  
4  
5  
6  
7  
8  
9  
10  
11  
12  
13  
14  
15  
16  
17  
18  
19  
20  
21  
22  
23  
24  
25  
26  
27  
28  
29  
30  
31  
32  
33  
34  
35  
36  
37  
38  
39  
40  
41  
42  
43  
44  
45  
46  
47  
48  
49  
50  
51  
52  
53  
54  
55  
56  
57  
58  
59  
60

54. Eisenberger R, Stinglhamber F, Vandenberghe C, Sucharski IL, Rhoades L. Perceived Supervisor Support: Contributions to Perceived Organizational Support and Employee Retention. *Journal of Applied Psychology*. 2002; 87, 3, 565–573.

For peer review only

**Table 1. Characteristics of training positions and the range of possible levels presented within the choice scenarios.**

| Characteristics                              | Description                                                                                                                                                                                   | Possible Levels                                                                                           |
|----------------------------------------------|-----------------------------------------------------------------------------------------------------------------------------------------------------------------------------------------------|-----------------------------------------------------------------------------------------------------------|
| Geographical Locality                        | This refers to the geographical location of the training position including amenities on offer, and the proximity to your family and friends, and/or spouse/partner employment opportunities. | Desirable Location<br>Undesirable Location                                                                |
| Familiarity With Specialty                   | This refers to how familiar you are with the specialty, whether you have rotated around it previously or have knowledge or experience of it.                                                  | Unfamiliar<br>Quite familiar<br>Very familiar                                                             |
| Culture of Working and Learning Environment. | This refers to perceiving that you are a valued and respected member of staff whose training and learning needs are supported.                                                                | Supportive Culture<br>Unsupportive Culture                                                                |
| Potential Earnings                           | This refers to how your potential earnings compare against average career earnings in your chosen specialty after completing training.                                                        | Average Earnings<br>5% above average earnings<br>10% above average earnings<br>20% above average earnings |
| Working Conditions                           | This refers to working conditions, such as rotas and shift patterns, amount of on call, time off and staffing levels.                                                                         | Excellent Conditions<br>Good Conditions<br>Poor Conditions                                                |
| Opportunities for Professional Development   | This refers to opportunities to undertake academic research, teaching, and training throughout your training programme and career.                                                            | Excellent opportunities<br>Average opportunities<br>Poor opportunities                                    |



Table 2. Results of the multinomial logit (MNL) model

| Job characteristic            | MLE (SE)          | WTP (95% Confidence interval) |
|-------------------------------|-------------------|-------------------------------|
| <b>1. Model parameters</b>    |                   |                               |
| Constant                      | 0.109 (0.035)**   |                               |
| Location: Desirable           | 1.200 (0.0402)*** | -45.75 [-56.1; -35.42]        |
| Working Culture: Supportive   | 1.050 (0.0432)*** | -40.0 [-49.1; -31.0]          |
| Familiarity: Quite familiar   | 0.389 (0.052)***  | -14.83 [-18.56; -11.09]       |
| Familiarity: Very Familiar    | 0.489 (0.059)***  | -18.6 [-24.61; -12.64]        |
| Working conditions: Good      | 0.762 (0.055)***  | -29.02 [-36.23; -21.81]       |
| Working conditions: Excellent | 1.011 (0.059)***  | -38.54. [-46.9; -30.2]        |
| PDP: Average                  | 0.336 (0.044)***  | -12.8 [-16.44; -9.22]         |
| PDP: Excellent                | 0.813 (0.054)***  | -31.0 [-38.72; -23.26]        |
| Potential Earnings            | 0.026 (0.003)***  |                               |
| <b>2. Model statistics</b>    |                   |                               |
| # Respondents                 | 671               |                               |
| # Observations                | 15,964            |                               |
| # Parameters                  | 10                |                               |
| Log-likelihood                | -3,676.4          |                               |

MLE: Maximum Likelihood Estimates; SE: Standard Errors; P: P-value significance (\*\*\*P < 0.001; \*\* P < 0.01, \*P < 0.05; WTP: Willingness-to-pay/accept estimates as % of earnings

Table 3. Main and interaction effects.

|                                |                            | $\beta$ | SE    | P   | MLE: Maximum Likelihood Estimate; SE: Standard Error; P-value significance (***) P < 0.001; ** P < 0.01; * P < 0.05; WTP: Willingness to pay/accept estimate as % of earnings (Ratio of estimated coefficient of attribute of interest with earnings coefficient) |
|--------------------------------|----------------------------|---------|-------|-----|-------------------------------------------------------------------------------------------------------------------------------------------------------------------------------------------------------------------------------------------------------------------|
| <b>Main effects</b>            |                            |         |       |     |                                                                                                                                                                                                                                                                   |
| Constant                       | -                          | 0.114   | .035  | **  |                                                                                                                                                                                                                                                                   |
| Location (Desirable)           | -                          | 1.40    | .075  | *** |                                                                                                                                                                                                                                                                   |
| Working Culture (Supportive)   | -                          | 1.271   | .0069 | *** |                                                                                                                                                                                                                                                                   |
| Familiar (Quite)               | -                          | 0.293   | .071  | *** |                                                                                                                                                                                                                                                                   |
| Familiarity (Very)             | -                          | 0.472   | .076  | *** |                                                                                                                                                                                                                                                                   |
| Working Conditions (Good)      | -                          | 0.840   | 0.082 | *** |                                                                                                                                                                                                                                                                   |
| Working Conditions (Excellent) | -                          | 1.162   | 0.083 | *** |                                                                                                                                                                                                                                                                   |
| PDP (Average)                  | -                          | 0.361   | 0.050 | *** |                                                                                                                                                                                                                                                                   |
| PDP (Excellent)                | -                          | 0.870   | 0.061 | *** |                                                                                                                                                                                                                                                                   |
| Potential Earnings             | -                          | 0.026   | 0.003 | *** |                                                                                                                                                                                                                                                                   |
| <b>2. Interaction effects</b>  |                            |         |       |     |                                                                                                                                                                                                                                                                   |
| Location (Desirable)           | Male                       | -0.374  | 0.059 | *** |                                                                                                                                                                                                                                                                   |
| Working Culture (Supportive)   | Male                       | -0.20   | .060  | **  |                                                                                                                                                                                                                                                                   |
| Location (Desirable)           | Graduate Entry (Yes)       | -0.162  | 0.075 | *   |                                                                                                                                                                                                                                                                   |
| Working Culture (Supportive)   | Graduate Entry (Yes)       | -0.168  | .0761 | *   |                                                                                                                                                                                                                                                                   |
| PDP (Average)                  | Graduate Entry (Yes)       | -0.084  | .094  |     |                                                                                                                                                                                                                                                                   |
| PDP (Excellent)                | Graduate Entry (Yes)       | -0.224  | .106  | *   |                                                                                                                                                                                                                                                                   |
| Familiarity (Quite)            | Training Application (Yes) | 0.175   | 0.084 | *   |                                                                                                                                                                                                                                                                   |
| Familiarity (Very)             | Training Application (Yes) | 0.029   | 0.096 |     |                                                                                                                                                                                                                                                                   |
| Working Culture (Supportive)   | Training Application (Yes) | -0.172  | 0.070 | *   |                                                                                                                                                                                                                                                                   |
| Working Conditions (Good)      | Training Application (Yes) | -0.120  | .0986 |     |                                                                                                                                                                                                                                                                   |
| Working Conditions (Excellent) | Training Application (Yes) | -0.240  | .0970 | *   |                                                                                                                                                                                                                                                                   |
| Location (desirable)           | Home Country (World)       | -.255   | .098  | **  |                                                                                                                                                                                                                                                                   |
| <b>3. Model statistics</b>     |                            |         |       |     |                                                                                                                                                                                                                                                                   |
| # Respondents                  | 662                        |         |       |     |                                                                                                                                                                                                                                                                   |
| # Observations                 | 15,868                     |         |       |     |                                                                                                                                                                                                                                                                   |
| # Parameters                   | 22                         |         |       |     |                                                                                                                                                                                                                                                                   |
| Model log-likelihood           | - 3,613.1                  |         |       |     |                                                                                                                                                                                                                                                                   |

1  
2  
3  
4  
5 Figure Legends:  
6

7 Title: Characteristics of training positions and main and interaction effects based upon the  
8 multinomial logit model.  
9

10 Table 1: Characteristics of training positions and the possible levels presented within the  
11 choice scenarios.  
12

13  
14 Table 2: Main Effects of the multinomial logit (MNL) model, (for all participants).  
15

16 Table 3: Main and Interaction effects of participant demographic characteristics (Gender,  
17 Graduate Entry, Training Application and Home Country).  
18  
19  
20  
21  
22  
23  
24  
25  
26  
27  
28  
29  
30  
31  
32  
33  
34  
35  
36  
37  
38  
39  
40  
41  
42  
43  
44  
45  
46  
47  
48  
49  
50  
51  
52  
53  
54  
55  
56  
57  
58  
59  
60

1  
2  
3  
4  
5  
6  
7  
8  
9  
10  
11  
12  
13  
14  
15  
16  
17  
18  
19  
20  
21  
22  
23  
24  
25  
26  
27  
28  
29  
30  
31  
32  
33  
34  
35  
36  
37  
38  
39  
40  
41  
42  
43  
44  
45  
46  
47  
48  
49  
50  
51  
52  
53  
54  
55  
56  
57  
58  
59  
60

**Figure 1: DCE instructions and an example choice scenario**

In this section of the survey we are interested in the factors that have influenced your career decision making in your FY2 year and what characteristics are the most important when making a decision on whether to apply for specialty training, core training or GP training programmes. This section of the survey will ask you a series of choices on what post FY2 training place you would prefer based on characteristics of training places.

Now you will be given a series of 13 choices to make that are all slightly different. For each choice you will be asked two separate questions. One will be to select which option you **prefer** between the 2 training positions on offer. You may not like either post but we would like you to state which one you think is better!

**There are no right or wrong answers to these questions, we are just interested in your opinion!**

| Choice 1 of 13: Which position would you prefer?                      |                          |                          |
|-----------------------------------------------------------------------|--------------------------|--------------------------|
|                                                                       | Position "A"             | Position "B"             |
| Geographical Location                                                 | Undesirable Location     | Desirable Location       |
| Familiarity with specialty                                            | Quite Familiar           | Unfamiliar               |
| Culture of working and Learning Environment.                          | Unsupportive Culture     | Supportive Culture       |
| Potential Earnings                                                    | 10% Above Average        | 20% Above Average        |
| Working Conditions                                                    | Excellent Conditions     | Poor Conditions          |
| Opportunities for Professional Development                            | Average Opportunities    | Poor Opportunities       |
| <b>Which position would you <u>prefer</u>?</b><br>Please tick one box | <input type="checkbox"/> | <input type="checkbox"/> |

210x297mm (300 x 300 DPI)

# BMJ Open

## What Factors Are Critical to Attracting NHS Foundation Doctors into Speciality or Core Training? A Discrete Choice Experiment

|                                 |                                                                                                                                                                                                                                                                                                                                          |
|---------------------------------|------------------------------------------------------------------------------------------------------------------------------------------------------------------------------------------------------------------------------------------------------------------------------------------------------------------------------------------|
| Journal:                        | <i>BMJ Open</i>                                                                                                                                                                                                                                                                                                                          |
| Manuscript ID                   | bmjopen-2017-019911.R2                                                                                                                                                                                                                                                                                                                   |
| Article Type:                   | Research                                                                                                                                                                                                                                                                                                                                 |
| Date Submitted by the Author:   | 05-Jan-2018                                                                                                                                                                                                                                                                                                                              |
| Complete List of Authors:       | Scanlan, Gillian; Aberdeen University; NA,<br>Cleland, Jennifer; University of Aberdeen<br>Johnston, Peter; NHS Education for Scotland, North Deanery<br>Walker, Kim; NHS Education for Scotland., NHS Education for Scotland and<br>UK Foundation Programme<br>Krucien, Nicolas; Univ Aberdeen<br>Skatun, Diane; University of Aberdeen |
| <b>Primary Subject Heading</b>: | Medical education and training                                                                                                                                                                                                                                                                                                           |
| Secondary Subject Heading:      | Health economics                                                                                                                                                                                                                                                                                                                         |
| Keywords:                       | EDUCATION & TRAINING (see Medical Education & Training), HEALTH ECONOMICS, MEDICAL EDUCATION & TRAINING                                                                                                                                                                                                                                  |
|                                 |                                                                                                                                                                                                                                                                                                                                          |

SCHOLARONE™  
Manuscripts

Only

## What Factors Are Critical to Attracting NHS Foundation Doctors into Speciality or Core Training?

### A Discrete Choice Experiment

Gillian Scanlan<sup>1</sup>, Jennifer Cleland<sup>2</sup>, Peter Johnston<sup>3</sup>, Kim Walker<sup>4</sup>, Nicolas Krucien<sup>5</sup>, Diane Skåtun<sup>5</sup>

<sup>1</sup> PhD candidate, Centre for Healthcare Education Research and Innovation (CHERI), Institute of Education for Medical and Dental Sciences, School of Medicine, Dentistry and Nutrition, University of Aberdeen, Aberdeen, Foresterhill, AB25 2ZD

<sup>2</sup> John Simpson Chair of Medical Education, Centre for Healthcare Education Research and Innovation (CHERI), Institute of Education for Medical and Dental Sciences, School of Medicine, Dentistry and Nutrition, University of Aberdeen, Aberdeen, Foresterhill, AB25 2ZD

<sup>3</sup> Depute Postgraduate Dean, NHS Education for Scotland, Scotland Deanery (North),

<sup>4</sup> Scotland Foundation School Director, NHS Education for Scotland, Foresterhill, Aberdeen, AB25 2ZP

<sup>5</sup> Research Fellow and Senior Research Fellow respectively, Health Economics Research Unit (HERU), School of Medicine and Dentistry, University of Aberdeen, Foresterhill, Aberdeen, AB25 2ZD

**Correspondence to:** Ms Gillian Scanlan

Email: r01gms15@abdn.ac.uk

## Abstract

**Objectives:** Multiple personal and work-related factors influence medical trainee careers decision making. The relative value of these diverse factors is under-researched, yet this intelligence is crucially important for informing medical workforce planning, and retention and recruitment policies. Our aim was to investigate the relative value of UK doctors' preferences for different training post characteristics during the time period when they either apply for speciality or core training, or take time out.

**Methods:** We developed a discrete choice experiment (DCE) specifically for this population. The DCE was distributed to all second year Foundation Programme doctors (F2s) across Scotland as part of the National Career Destination Survey in June 2016. The main outcome measure was the monetary value of training-post characteristics, based on willingness to forgo additional potential income and willingness to accept extra income for a change in each job characteristic calculated from regression coefficients.

**Results:** 677/798 F2 doctors provided usable DCE responses. Location was the most influential characteristic of a training position, followed closely by supportive culture and then working conditions. F2 doctors would need to be compensated by an additional 45.75% above potential earnings to move from a post in a desirable location to one in an undesirable location. Doctors who applied for a training post placed less value on supportive culture and excellent working conditions than those who did not apply. F2 males valued Location and a supportive culture less than female F2s.

**Conclusion:** This is the first study focusing on the career decision making of UK doctors at a critical careers decision-making point. Both location and specific job-related attributes are highly valued by F2 doctors when deciding their future. This intelligence can inform workforce policy to focus their efforts in terms of making training posts attractive to this group of doctors to enhance recruitment and retention.

1  
2  
3 *Word count – 300*  
4

5 **Strengths and Limitations of this Study**  
6

- 7 • An important strength of this study is that it surveyed all Foundation Programme year two  
8 doctors in Scotland: that is, those at a critical point in medical careers decision making (i.e.  
9 the time of committing to specific speciality or core training programmes).  
10
- 11 • Survey responses were received from 84.8% of the eligible population of Foundation Year  
12 Two Doctors in Scotland (n=798).  
13
- 14 • Our sample was diverse and representative of the UK population of F2 doctors in terms of:  
15 gender, graduate application rates and those who applied vs did not apply for training.  
16
- 17 • Our Focus was on generic ‘push-pull’ factors rather than speciality choice (i.e. surgery or  
18 general practice). Thus, we could not investigate if there was an association between  
19 certain preferences and whether or not a respondent applied for speciality training, or for  
20 particular training programmes.  
21  
22  
23  
24  
25  
26  
27  
28  
29  
30  
31  
32  
33  
34  
35  
36  
37  
38  
39  
40  
41  
42  
43  
44  
45  
46  
47  
48  
49  
50  
51  
52  
53  
54  
55  
56  
57  
58  
59  
60



## **Introduction**

Accurately predicting medical workforce supply is increasingly challenging. Doctors no longer behave in time-recognised ways in terms of career decision making, and their behaviour no longer fits with service need<sup>1</sup>. For example, in the UK context, medical graduates are choosing not to progress through training as predicted. In 2016, nearly 50% of those graduates completing the Foundation Programme (the generic two-year training programme which bridges the gap between medical school and being eligible to apply for core, specialty or general practice) did not apply for core medical training or Specialty training (including General Practice) at the standard point in time<sup>2,3</sup>. Simply put, one in two of today's medical graduates left the training pipeline at the first natural break opportunity while keeping their options open (i.e. with full registration and eligibility to apply for higher training). Instead, they opted to take a break from training, often working overseas for a period of time<sup>4</sup>. Although working overseas has always been a popular option<sup>5</sup>, the difference nowadays is that at least one in twenty Foundation Programme (FP) doctors appear to leave the UK workforce for good<sup>6</sup>. Given this "brain drain", more understanding of what is important to the careers decision making of doctors as they enter their post-FP phase is crucial in order to identify how best to enhance the attractiveness of medical training, and thus ensure sufficient doctors to deliver service now and in the future<sup>7</sup>.

There is a wide literature examining the factors influencing medical student, trainee doctor and qualified healthcare professional workplace supply and career decision making factors. This literature highlights the influence of socio-demographic factors such as gender<sup>8-10</sup> and the importance of financial incentives<sup>11-14</sup>, professional and educational development<sup>14,15</sup>, geographical location<sup>11,16,17</sup>, work-life balance<sup>18,19</sup>, quality of life<sup>20,21</sup>, flexibility<sup>18,21,22</sup>, working conditions<sup>17,20,23,24</sup> and prior education<sup>25</sup> in medical careers decision making. Recent studies have provided some insight into Foundation doctors' preferences specifically. This research suggests that job-related factors, such as the level of support and satisfaction throughout the Foundation Programme impact on FP

1  
2  
3 doctor career decision making<sup>26,27,28</sup>. This information is important as it was previously assumed  
4 that medical careers preferences and values were formed prior to leaving medical school<sup>20,21,29</sup>. If  
5 this is not the case, it is crucial to identify the key attributes that play a crucial role in making training  
6 posts more attractive to those in the early stages of postgraduate training, as this intelligence may  
7 be used to inform interventions aimed at increasing the number of doctors staying in the training  
8 pipeline.  
9  
10  
11  
12  
13  
14  
15

16  
17 Senior doctors, medical trainee and senior student preferences for job characteristics<sup>17,30,31</sup> have  
18 progressed from relying on simple surveys<sup>32,33</sup> to using discrete choice experiments (DCEs) to identify  
19 the relative importance medical students and trainees place on different characteristics<sup>17,30</sup>.  
20  
21 However, to date, this approach has not been used specifically with F2 doctors although this is a  
22 group whose career-related decisions are crucial to the present and future delivery of care. Indeed,  
23 very little is known about the critical factors in F2 career decision making. The original UK DCE work  
24 of Cleland and colleagues did not allow for the identification of the most important attributes that  
25 are critical for Foundation year two (F2) doctors, while DCEs with junior doctors in other contexts  
26 have narrowly focussed upon specific careers preferences<sup>17,34-36-34</sup>.  
27  
28  
29  
30  
31  
32  
33  
34  
35  
36  
37

38 Thus, to address this gap in the literature, we developed a new DCE (see later) to assess the  
39 importance of different factors that make training posts more, or less, attractive to FY2 Doctors. Our  
40 ultimate aim in doing so was to investigate the relative value of F2 doctor's preferences for different  
41 training post characteristics at the time in which they either apply for core training, specialty training  
42 or take a break.  
43  
44  
45  
46  
47  
48  
49  
50  
51  
52  
53  
54  
55  
56  
57  
58  
59  
60

## **Methods**

This study used a quantitative technique, known as a DCE, to elicit training post preferences<sup>17,37</sup>. This technique presents respondents with a series of choices to be made between hypothetical training posts. Each post is presented as a bundle of key characteristics (such as geographical location, culture of working and learning environment, etc) where each bundle presents alternative levels of these characteristics (desirable or undesirable location, etc, see table 1). By selecting one hypothetical training post over another, respondents indicate their willingness to trade off these characteristics and in doing so the relative importance of the characteristics can be measured. Thus, the DCE approach can measure how willing an individual is to substitute one attribute for another<sup>31</sup> (e.g. being very familiar with a speciality over poorer working conditions). These trade-offs can be converted into willingness-to-pay (WTP) values when a monetary attribute is included in the DCE<sup>37,38</sup>.

## **Context**

In the UK, medical students spend between 4-6 years at medical school. On graduation, over 98% of medical students apply for the Foundation Programme (FP). This is a generic two-year training programme which bridges the gap between medical school and specialty training. FP doctors mostly undertake six four-month rotations, with regular assessments and milestones. At the end of the F1 year, trainees obtain full registration with the regulator (GMC). Satisfactory completion of F2 makes them eligible to apply for further specialty specific training including core and general practice. In November of their second year, during their fourth rotation, F2 doctors can apply for the next stage of their postgraduate training through a national recruitment and selection process. The specialty training programmes recognised by the General Medical Council (GMC) last between 3 – 8 years and at the end of training, doctors are awarded the certificate of completion of training (CCT) which allows them to work as a consultant or GP in that specialty.

### Development of the discrete choice experiment (DCE)

Following guidelines<sup>39</sup> we used qualitative methods to generate the characteristics (e.g., working conditions) and levels (e.g., desirable, undesirable) presented within the hypothetical training posts, and to ensure that both these and the language used were clear, sensible, and meaningful to the respondents. We first consulted the international literature on medical labour markets and careers decision making to identify which attributes might be relevant. However, as little of the literature was drawn from our target population of post-registration, pre-specialty training doctors were needed to bridge this evidence gap to refine the content and choice of attributes. To find out more about what was important to this group, we carried out two focus groups and 21 individual interviews with Foundation Doctors drawn from two contrasting Scottish regions between December 2015 and April 2016. These regions were chosen as they are diverse in terms of size and geographical locality, and because local data indicated that they attract a different groups of FP doctors in terms of home origin and medical school attended. Using a semi-structured interview schedule, we gathered data about the key characteristics considered when applying for training posts.

This two-stage methodology identified five characteristics of training positions that were likely to be major drivers of Foundation Year 2 (F2) doctors in their medical careers decision-making behaviour and specifically their progression into the specialty training phase (see Table 1). These were the culture of the working and learning environment, opportunities in professional development and the familiarity with the Specialty (see Table 1). Two further characteristics coincided with those identified previously and used within a DCE for medical trainees in general: that is working conditions and geographical location<sup>17</sup>. The levels attached to each of these characteristics were informed by the existing literature, the qualitative data and the expert knowledge of the research team. The resulting DCE was piloted with 31 F2 doctors who provided feedback on the range and

1  
2  
3 wording of the attributes and levels. This piloting also allowed us to test the face validity of the DCE  
4  
5 questionnaire. No major changes were deemed necessary based on the pilot.  
6  
7

8  
9 Potential earnings were not identified in the qualitative work as a potential motivator of F2 doctors'  
10  
11 decisions, but we still decided to include this characteristic in the DCE attribute to allow for  
12  
13 computation of willing-to-pay (WTP) values. WTP values correspond to trade-offs between changes  
14  
15 in potential earnings and the other post characteristics (e.g., how large pay increase should be to  
16  
17 compensate F2 doctors for a deterioration in working conditions). These WTP values can be used to  
18  
19 identify the most valued characteristics (i.e., those with the largest impact on F2 doctors' decisions).  
20  
21

22  
23  
24 ----- **Table 1 about here** -----  
25

26  
27  
28 The survey explained the DCE task and described each attribute and its levels before the tasks were  
29  
30 presented. In each task, the F2s doctors were asked to choose their preferred training position  
31  
32 between two available (see Figure 1).  
33  
34

35  
36 The training positions were presented in 13 choice sets, each containing two hypothetical training  
37  
38 positions. These choice sets were generated through NGENE<sup>40</sup>, a statistical software package for  
39  
40 designing choice experiments. A D-efficient design with null priors was generated with 12 choice sets  
41  
42 to investigate the main effects of changes in the training position's characteristics on respondents'  
43  
44 choices<sup>41</sup>. In addition, one choice set was repeated (task #13) to check for choice consistency (i.e.  
45  
46 whether the respondents answered consistently to a repeated choice set task. All choice sets were  
47  
48 randomised and computed into 12 choice sets, this prevented repetition of a choice task.  
49  
50

51  
52  
53 ----- **Figure 1 about here** -----  
54  
55

### Sample and Data Collection

The DCE was incorporated into the National F2 Career Destination Survey 2016<sup>4</sup> within Scotland. This e-survey collects data on the career destinations of F2 doctors as near as practicable to completion of their foundation training and so was considered an apt vehicle for our DCE. The Destination Survey was sent via email by the Scottish Foundation Programme director to all Scottish F2 doctors due to complete FP2 in August 2016) (n=798) in June 2016, and closed in August 2016. Two reminder emails were sent during this time. No formal sample size calculation was undertaken as we surveyed the whole population of FP2 doctors in Scotland. Note that for the DCE a minimum of only 35 respondents was needed to estimate sample preferences for job post.

### Preference analysis

We modelled the probability that the training position is selected as a function of the characteristics and levels being offered within that particular choice set. This can be represented via a multinomial logit model (MNL)<sup>42</sup> with the underlying utility ( $V_{ntj}$ ) obtained through the characteristics of the training positions presented by the following:  $V = b.X + e$ , where  $e$  is an error term which is independently and identically distributed as type 1 extreme value.

$$V_{ntj} = \alpha + \beta_1 \text{Geographical Locality: Desirable} + \beta_2 \text{Familiarity with Speciality: Unfamiliar} + \beta_3 \text{Familiarity With Speciality: Quite Familiar} + \beta_4 \text{Culture of Working and learning Environment: Supportive} + \beta_5 \text{Working Conditions: Excellent} + \beta_6 \text{Working Conditions: Good} + \beta_7 \text{Opportunities in Professional Development: Excellent} + \beta_8 \text{Opportunities in Professional Development: Average} + \beta_9 \text{Potential Earnings. (1)}$$

The analysis of the five qualitative characteristics (i.e., geographical locality, familiarity with speciality, culture of working and learning environment, working conditions, and opportunities for professional development) was analysed on STATA and are entered in the model as dummy coded

1  
2  
3 variables and their effects on respondents' choices are captured by the ( $\beta_1$ ) to ( $\beta_8$ ) coefficients,  
4  
5 which represent F2 doctors' preferences for the training position characteristics. The parameter ( $\beta_9$ )  
6  
7 measures the influence of a 1-unit change in the earnings characteristic on respondents' choices. ( $\alpha$ )  
8  
9 is the model intercept. For the ( $\beta$ ) parameters, a positive estimate would indicate that an increase in  
10  
11 the corresponding characteristic would make the job position more desirable and thus more likely to  
12  
13 be selected by the trainees. For example, a positive estimate for ( $\beta_1$ ) would indicate that a shift from  
14  
15 "undesirable" to "desirable" geographical location makes a training position more attractive. To  
16  
17 locate these preference estimates on a more meaningful (or easier to interpret) scale, we compute  
18  
19 WTP values as the ratio of preferences for each training position characteristic ( $\beta_1$ :  $\beta_8$ ) and potential  
20  
21 earnings ( $\beta_9$ ). We used the delta approach on STATA to calculate the WTP confidence intervals.  
22  
23 These WTP values indicate how much the respondents would be willing to pay to improve the job  
24  
25 characteristic (or should be compensated for a deterioration in the characteristic) (e.g., how much  
26  
27 financial income would need offered to compensate a trainee for a position offering an  
28  
29 "undesirable" location rather than a "desirable" location). This in turn allows us to directly state the  
30  
31 relative importance of the characteristics in the career decision making.  
32  
33  
34  
35

### 36 **Preferences heterogeneity analysis**

37  
38 The analysis above provides an estimate of the preferences for the average respondent within our  
39  
40 sample. We therefore further explored whether preferences for training post characteristics vary by  
41  
42 specific personal characteristics. Following the literature on career decision making of junior doctors,  
43  
44 we considered the impact of the following variables:  
45

- 46  
47 • Graduate Entrant on entering Medical School (Graduate VS Non-Graduate)<sup>25</sup>
- 48  
49 • Gender (Male Vs Female)<sup>8-10</sup>
- 50  
51 • Country of Origin (Scotland, Rest of the World VS R/UK)<sup>16,18</sup>
- 52  
53 • Application for Further Training (Application Made Vs No Application)<sup>1-6</sup>
- 54  
55
- 56  
57
- 58  
59

1  
2  
3 To assess the variability in F2 choices we included interaction terms of these personal characteristics  
4 with the training post characteristics. Given the positive signs on the main effects a statistically  
5 significant interaction effect (along with its accompanying sign) will indicate whether that particular  
6 personal characteristic is associated with an increased (positive sign) or reduced (negative sign)  
7 strength of preference for the training post characteristic. However, this strategy would lead to a  
8 model with a relatively large number of parameters (i.e., each of the nine preference parameters ( $\beta$ )  
9 can be interacted with the five personal characteristics parameters, leading thus to 45 interaction  
10 effects, for a total of 55 model parameters). Thus, for ease of reporting and interpretation, we used  
11 a backward stepwise regression. This approach allowed us to start a model with all relevant variables  
12 of interest. In the next stage the least significant variable was removed from the model using a  
13 significance level of 20% (P-value < 0.2). This approach then applied the same rule to smaller models  
14 until all remaining variables were statistically significant. Thus, this method allowed us to identify the  
15 most relevant interaction effects and allowed for a more parsimonious choice model. And in the  
16 final conditional logistic regression model analysis all personal characteristics with a non-significant  
17 level of 20% were removed.  
18  
19  
20  
21  
22  
23  
24  
25  
26  
27  
28  
29  
30  
31  
32  
33  
34  
35

### 36 **Ethics**

37  
38 Ethical approval was granted for all components of this work by the College of Life Sciences and  
39 Medicine Ethical Research Board (CERB), University of Aberdeen, and the study was also approved  
40 by NHS Research Scotland (NHS R&D).  
41  
42  
43  
44  
45  
46  
47  
48  
49  
50  
51  
52  
53  
54  
55  
56  
57  
58  
59  
60



## **Results**

The DCE was answered by 677/798 F2 doctors, giving an 84.8% response rate. Of these, 58.6% (n=397) were female, 40% (n=271) male, with 9 not indicating their gender. 74.6% (n=505) had graduated from medical school in Scotland, 20.8% (n=141) graduated elsewhere in the UK, and 4.1% (n=28) graduated outside the UK. Three participants did not indicate where they graduated and were classified as missing data. 60.3% (n=408) were Scottish born, 24.8% (n=168) born elsewhere in the UK, and the others from outside the UK (14.9% [n=101]). 78.6% (n=532) had gone to medical school as undergraduates and 21.4% (n=145) as graduate entrants. 54.7% (n=370) applied for speciality/core/GP training and 45.3% (n=307) did not apply for any training.

We removed 6 respondents because of issues on DCE data: One trainee did not complete the DCE questions, 5 trainees answered serially for each question (e.g. they systematically answered choice 1 (or choice 2) in the DCE tasks) or answered differently to a repeated choice task providing thus no information about their preferences for position characteristics. This represents an 84.1% usable response rate.

### **Main effect Model for Logistical Regression Analysis**

Results can be found in Table 2. The statistical significance of at least one level of each characteristic indicates that all key characteristics identified in the DCE design stage played a significant role in the choice of training position. Moreover, the positive coefficients indicate that an improvement in the characteristic was associated with an increased preference for a training post. On average F2 doctors prefer a familiar training position with a more desirable location, which offers a supportive working culture, better working conditions and opportunities for professional development.

### WTP analysis

The willingness-to-pay (WTP) values along with their confidence intervals are displayed in the last column of Table 2. For F2s to accept a training position with an undesirable rather than a desirable geographical location, the expected potential earnings should be increased by 45.74%. This is the largest estimated WTP value, indicating thus that a move from a desirable to an undesirable location would be the main driver of F2 doctors' choices.

Additionally, supportive culture was also found to be highly valued by F2 trainees. The respondents valued the move from a supportive working environment at 40.02% above average expected earnings. Thus, a training post that offers an unsupportive culture for trainee doctors must offer a compensation of just over 40% above average potential earnings, before it will be considered attractive training.

The working conditions attribute was also highly valued by F2 doctors who valued the move from excellent to poor working conditions as equivalent to 38.54% of their annual potential income. However, within this attribute the move from good working conditions to poor working conditions provides the higher value (equivalent to 29% of their annual potential income). The additional move from good to excellent working conditions only provided the equivalent of an additional 9.5% increase in annual potential income.

Furthermore, F2s valued a move from a training post with average opportunities in professional development (CPD) to a training post that offered excellent CPD more highly than a move from poor to average CPD opportunities. The move from poor to excellent professional development was valued at 31% of average expected earnings. Whereas a move from average to poor opportunities in professional development was valued at 12.8% of average expected earnings.

1  
2  
3 Additionally, F2s valued working in a very familiar speciality more highly than a quite familiar  
4 speciality. A move from a very familiar speciality to an unfamiliar speciality would need to be  
5 compensated more than 18%, with this mostly explained by the finding that a move from a quite  
6  
7  
8  
9 familiar speciality to an unfamiliar one would need to be compensated by more than 14%.

### 13 **Preferences heterogeneity analysis**

14  
15 We investigated how F2 doctors' personal characteristics may affect their training post preferences.  
16  
17 The results are reported in Table 3. Note that the number of observations in this final model are  
18  
19 lower than in the previous model because nine respondents with missing values on their personal  
20  
21 characteristics had to be removed from the analysis.  
22  
23  
24  
25

26 ..... **Table 3 around here** .....

27  
28  
29  
30 Nine interaction effects reached significance at the 95% confidence level. The results indicate that  
31  
32 males value a desirable location and supportive culture less than female trainees as indicated by the  
33  
34 negative signs on the relevant interaction terms. F2 doctors born outside the UK value a desirable  
35  
36 location less than F2 doctors from the rest of the UK (excluding Scotland). Graduate entrant trainees  
37  
38 place less value on a desirable location, supportive culture and excellent opportunities in  
39  
40 professional development than F2 who were non-graduates on applying for medical school. F2  
41  
42 doctors who stated that they had applied for speciality, core or GP training placed significantly less  
43  
44 value on a supportive culture and excellent working conditions than those who did not apply for  
45  
46 continued training after F2. However, those that did apply valued a quite familiar speciality more  
47  
48 than those who did not apply.  
49  
50  
51  
52  
53  
54  
55  
56  
57  
58  
59  
60

## **Discussion**

To the best of our knowledge, this is the first study focusing solely Foundation Year 2 doctors' career decision making and the first that assesses not just the value F2 doctors place on attributes of a training post but also the relative strength of these preferences. We found that all training post attributes in the model influenced the choices of our respondents. However, one attribute stood out as being most valued: desirability of geographical location. F2 doctors were willing to trade up to 45% of their average expected earnings to have a training post which was in a desirable location (defined as offering amenities and proximity to family and friends) compared to undesirable location. While this attribute could arguably be said to have little to do with the nature of the post as such, attributes that were more directly job-related were also very highly valued. For example, F2 doctors were willing to trade around 40% of their average expected earnings to have a training post with a supportive culture compared to one with an unsupportive culture, and just over 38% of their average expected earnings to move from excellent working conditions to poor. These valuations were strongest between poor and good, compared to good and excellent. This is in line with previous UK research that highlighted that the change most valued for medical students and trainee doctors was from poor to good working conditions<sup>17,30</sup>.

We found relatively few significant interactions between F2 doctor characteristics and preferences, suggesting that, although our sample was heterogeneous in terms of gender, ethnicity, origin, graduate entrants, non-graduate entrants to medical school, they were remarkably homogenous in terms of the factors they value in a medical career. The few differences related to F2 characteristics indicated, first, females value a desirable location and supportive working and learning culture more than their male counterparts. Differences between male and female medical students and doctors for job-related preferences are well established<sup>8,9,18</sup>. Typically, women have tended to prioritise work-life balance more than men. We found that factors which could loosely be related to this

1  
2  
3 (desirable location, supportive environment) were more important to women – but they were also  
4 important to our male respondents, just a little less so. This suggests that traditional gender  
5 differences in medicine are shifting, and previous marked differences between men and women may  
6 not be so apparent in the current generation.  
7  
8  
9

10  
11  
12  
13 Second, those who entered medicine as graduates placed less value on a desirable location and  
14 supportive culture than those who entered medical school as school leavers. Similar findings were  
15 found by Cleland et al. (2017). The methodology of our study means we cannot identify why this is  
16 the case, but drawing on other research, this may be associated with the need to get a job/training  
17 post without delay due to level of debt<sup>43,44</sup> or greater family responsibilities<sup>45</sup>. Or, alternatively, it  
18 could be that this group are more confident of their abilities and less reliant on support from work  
19 colleagues than their school leaver equivalents<sup>46,47</sup>. Future qualitative research is needed to gain  
20 further insight.  
21  
22  
23  
24  
25  
26  
27  
28  
29  
30

31  
32 Data shows that 50% of graduates completing the foundation programme did not apply for speciality  
33 training or core training<sup>4</sup>. Our study shows that F2 doctors who applied for training placed  
34 significantly less value on excellent working conditions and a supportive culture than those who did  
35 not do so. Again, we do not know the reasons for this, but it merits further investigation, perhaps  
36 using qualitative methodologies to explore differences in personal characteristics such as self-  
37 efficacy<sup>48,49</sup>, experience of social support from senior staff and co-workers<sup>48,50</sup>, and/or prior  
38 experience<sup>10</sup>. Anecdotal evidence suggests that some trainees are reluctant to apply for further  
39 training until they have gained additional experience and because once they have committed to a  
40 speciality (or training programme), career changes are difficult. This is acknowledged in the medical  
41 literature: a recent report by the GMC argues that more flexibility is needed in training to  
42 acknowledge prior learning and allow trainees to transition between specialities with more ease<sup>51</sup>.  
43  
44  
45  
46  
47  
48  
49  
50  
51  
52  
53  
54  
55  
56  
57  
58  
59  
60

1  
2  
3 Increasing flexibility in this way may well help recruitment but our study shows that good working  
4 conditions and a supportive culture are also of great importance to trainees.  
5  
6  
7

8  
9 For those doctors who did apply for core/higher/GP training in their F2 year, being quite familiar  
10 with a specialty was highly valued. This makes intuitive sense: committing to training can be seen as  
11 committing to a very specific medical career. Knowing a little about the specialty and the nature of  
12 the work seems a reasonable prerequisite for making such a decision. This reinforces the importance  
13 of giving medical students and trainees a wide range of experiences, in order to encourage trainees  
14 into the breadth of specialities.  
15  
16  
17  
18  
19  
20  
21  
22  
23

24 The location of a job will be known prior to accepting a training post. However, it may not be  
25 reasonable to assume that doctors will be able to determine other variables in advance. For  
26 example, they may not be able to assess the level of support in their new workplace, or have a  
27 detailed knowledge of the staffing levels or career development opportunities. However, given  
28 emerging evidence indicates that experiences during the Foundation Programme are influential in  
29 early career decision making, it is perhaps timely to consider a critical evaluation of this programme.  
30  
31  
32  
33  
34  
35  
36  
37  
38

39 An important strength of this study is that it surveyed all F2 doctors in Scotland: that is, those at a  
40 critical point in medical careers decision making, the traditional time of committing to training in a  
41 specific specialty. Our focus was generic “push-pull” factors<sup>52</sup> rather than specialty choice (e.g., a  
42 preference for surgery or general practice), so we could not investigate possible links between these  
43 preferences and specialty preferences. This means that we could not compare if compensation  
44 values varied between those whose preference was to apply for one specialty rather than another,  
45 and/or for a popular specialty versus a less competitive specialty. However, this generic focus  
46 allowed us to pull out differences between those who did, and did not, apply for core training or  
47  
48  
49  
50  
51  
52  
53  
54  
55  
56  
57  
58  
59  
60

1  
2  
3 specialty training, during F2. Future research could look at the association between particular  
4 preferences (e.g., for work-life balance) and specialty choice.  
5  
6  
7

8  
9 There are approximately 8,000 F2 doctors in the UK at any one point in time, of whom about 10%  
10 are based in Scotland. Our sample was diverse and representative of the UK population of F2 doctors  
11 in terms of: gender, graduate application rates and those who applied vs did not apply for training<sup>4</sup>.  
12  
13 In our DCE most graduated in Scotland and were born in Scotland, this statistic is something that  
14 may differ from the rest of the UK. However, Cleland et al. (2016) did not find any statistical  
15 significance in the preference choices between trainees from different regions of the UK. While our  
16 opt-out clause was explicit, and selected by a proportion of potential respondents, our survey  
17 escaped the usual response to an e-survey request, that of automatic deletion. The study was  
18 carried out after the national application and selection process for core, specialty or GP training was  
19 almost complete and at the completion of foundation training. Our participants had thus been  
20 thinking about their future medical career in the previous months, so the timing of our DCE was  
21 good. An interesting area for future research may be to access specialty training applications to  
22 compare the DCE responses with trainees' actual careers-related behaviour.  
23  
24  
25  
26  
27  
28  
29  
30  
31  
32  
33  
34  
35  
36  
37

38 As mentioned previously, the DCE methodology has been used in other contexts with those in the  
39 early stages of medical training. Work from Australia, using a study-specific DCE, found that doctors  
40 in their first three years of hospital medicine training post-graduation were willing to sacrifice up to  
41 50% of their expected income to control their time on call (the MABEL study<sup>34</sup>). The same  
42 programme of work also looked at how to attract GPs in Australia into rural posts, identifying the  
43 monetary value doctors placed on staying in post compared to moving to a different location<sup>36</sup>. The  
44 only other DCE we have identified utilised medical students in Norway, again focusing on GP  
45 recruitment<sup>53</sup>. This identified that the opportunity to control working hours and opportunities in  
46 professional advancement lead to a higher probability of medical students considering a move to a  
47  
48  
49  
50  
51  
52  
53  
54  
55  
56  
57  
58  
59  
60

1  
2  
3 rural location when they were fully qualified<sup>53</sup>. While it is difficult to compare across different DCE  
4  
5 studies because of the bespoke nature of DCEs, there seem to be some common denominators in  
6  
7 terms of what could broadly be termed working conditions. The arguably non-work-related factor of  
8  
9 location may also have been important in the MABEL and Norwegian studies: we cannot tell if this  
10  
11 was the case as in both studies the DCE attributes focused only on work-related factors (more  
12  
13 general factors such as location near friends and family were not incorporated). It may be that some  
14  
15 factors are country-specific but only cross-context studies will provide this insight.  
16  
17

18  
19 This is the first study that focusses on the career decision making of UK doctors at a critical career  
20  
21 decision making point, that of applying, or not, for core medical training or specialty training. We  
22  
23 have identified that both location and specific job-related attributes are highly valued by junior  
24  
25 doctors when making careers decisions. Location is not something that can change. However, a  
26  
27 supportive working and learning culture is something that a healthcare organisation has the power  
28  
29 to change from within. Focusing on providing a supportive working environment is something that  
30  
31 may help attract and retain medical trainees. In other words, meeting the needs of F2 doctors may  
32  
33 help to strengthen the level of commitment doctors in training have towards the NHS<sup>54</sup>, help with  
34  
35 retention of this group of doctors and hence meet immediate and future service delivery needs.  
36  
37  
38  
39  
40  
41  
42  
43  
44  
45  
46  
47  
48  
49  
50  
51  
52  
53  
54  
55  
56  
57  
58  
59  
60



### Contributions

JC, PJ and KW had the original idea for this project and obtained the funding for GS's doctorate. The development of the DCE was led by GS in collaboration with JC, PJ, KW and DS. GS prepared the ethics application. GS lead on the literature review. DS and NK supervised the analysis, which was carried out by GS. JC, PJ and KW contributed throughout the analysis of the DCE. GS drafted the paper guidance from DS and NK for the methods, analysis and results sections, with JC revising drafts. All authors contributed to the final paper. The study is guaranteed by the University of Aberdeen.

### Collaborator Statement

This project is in collaboration with NHS Education for Scotland.

### Ethical permission

Ethical permission was granted for this study from the University of Aberdeen College of Life Sciences and Medicine Ethics Research Board (CERB/2015/12/1269, approval granted 22/04/16).

### Funding

Our thanks go to NHS Education for Scotland for funding this programme of work.

### Competing Interests

There are no competing interests in this study

### Data Sharing

All available data can be obtained by contacting the corresponding author (Gillian Scanlan).

### Acknowledgements

Our thanks to all those who participated in developing and piloting the DCE and completing the survey. With thanks to NHS Education Scotland for merging the DCE onto the destination survey.

## References

1. Arthur MB, Khapova SN, & Wilderom CPM. Career success in boundaryless world. *J Organ behave.* 2005;26, 177-202.
2. Rimmer A. Nearly half of trainees chose not to progress straight into specialty training in 2015. *BMJ careers.*  
[http://careers.bmj.com/careers/advice/Nearly\\_half\\_of\\_trainees\\_chose\\_not\\_to\\_progress\\_straight\\_to\\_specialty\\_training\\_in\\_2015](http://careers.bmj.com/careers/advice/Nearly_half_of_trainees_chose_not_to_progress_straight_to_specialty_training_in_2015) (Accessed 8th of March 2016).
3. UK foundation Programme Office. F2 Career Destination Report 2015.  
<http://www.foundationprogramme.nhs.uk/pages/home/keydocs> (Accessed 5th of March, 2016).
4. UKFPO CAREER DESTINATION REPORT 2016  
[www.foundationprogramme.nhs.uk/download.asp?file=Careers\\_destination\\_2016.pdf](http://www.foundationprogramme.nhs.uk/download.asp?file=Careers_destination_2016.pdf)  
(accessed 8<sup>th</sup> of March 2017)
5. Smith C, Low L. The gap between foundation years and specialty training. *BMJ Careers* 21st February 2012. <http://careers.bmj.com/careers/advice/view-article.html?id=20006722>.  
(Accessed 5<sup>th</sup> of November 2016)
6. General Medical Council. Interactive reports to investigate factors that affect progression of doctors in training.  
[http://www.gmcuk.org/Briefing\\_note\\_Exams\\_and\\_recruitment\\_outcome\\_reports.pdf\\_6006997.pdf\\_60086828.pdf](http://www.gmcuk.org/Briefing_note_Exams_and_recruitment_outcome_reports.pdf_6006997.pdf_60086828.pdf) (Accessed on the 16th of May 2016)
7. Collins A, Young R. (eds.) *The Future of Career.* Cambridge: Cambridge University Press; 2000.

- 1
- 2
- 3 8. Riska E. Gender and Medical Careers. *Maturitas*. 2011; 68 (3), 264-267.
- 4
- 5
- 6 9. Behrend TS, Thompson LF, Meade AW, Grayson MS, Newton DA. Gender Differences in
- 7 Career Choice Influences. *Industrial and Organisational Psychology*. 22nd Annual Meeting,
- 8 New York. 2007.
- 9
- 10
- 11
- 12 10. Pianosi K, Bethune C, Hurley KF. Medical student career choice: a qualitative study of fourth-
- 13 year medical students at Memorial University, Newfoundland. *CMAJ Open*. 2016; 4 (2).
- 14
- 15
- 16
- 17 11. Viscomi M, Larkins S, Gupta TS. Recruitment and retention of general practitioners in rural
- 18 Canada and Australia: a review of the literature. *Can J Rural Med*. 2013;18:13–23.
- 19
- 20
- 21
- 22 12. New Zealand Ministry of Health. Voluntary Bonding Scheme; 2012.
- 23 <http://www.health.govt.nz/our-work/health-workforce/voluntary-bonding-scheme>
- 24 (Accessed 3rd March 2017).
- 25
- 26
- 27
- 28
- 29 13. Pathman DE, Konrad TR, King TS, Taylor DH, Koch GG. Outcomes of states' scholarship, loan
- 30 repayment, and related programs for physicians. *Med Care*. 2004;42:560–8.
- 31
- 32
- 33
- 34 14. Rao KD, Ryan M, Shroff Z, Vujicic M, Ramani, S. Rural Clinician Scarcity and Job Preferences
- 35 of Doctors and Nurses in India: A Discrete Choice Experiment. *PLoS ONE*. 2013; 8 (12).
- 36
- 37
- 38
- 39 15. Takemura T, Kielmann K, Blaauw, D. (2016). Job Preferences among clinical officers in public
- 40 sector facilities in rural Kenya: a discrete choice experiment. *Human Resources for Health*.
- 41 2016; 14 (1).
- 42
- 43
- 44
- 45 16. Verma P, Ford J.A, Stuart A, Howe, A, Everington S, Steel N. A systematic review of
- 46 strategies to recruit and retain primary care doctors. *BMC Health Services*. 2016;16, 126.
- 47
- 48
- 49
- 50 17. Cleland J, Johnston PW, Watson V, Krucien, N, Skatun D. What do UK doctors in training
- 51 value in a post? A discrete choice experiment. *Med Educ*. 2016; 50: 189-202.
- 52
- 53
- 54
- 55
- 56
- 57
- 58
- 59
- 60

18. Gibis B, Heinz A, Jacob R & Muller CH. The Career Expectations of Medical Students: findings from a Nationwide Survey in Germany. *Dtsch Arztebl Inter.* 2012; 109 (18), 327-332.
19. Rich A, Viney R, Needleman S, Griffin A, Woolf K. You can't be a person and a doctor': the work-life balance of doctors in training- a qualitative study. *BMJ Open.* 2016; 6 :e013897
20. Cleland J, Johnston PW, French FH, Needham G. Associations between medical school and career preferences in Year 1 medical students in Scotland. *Med Educ.* 2012. 46 (5), 473-484.
21. Cleland JA, Johnston PW, Anthony M, Khan N, Scott NW. A survey of factors influencing career preference in new-entrant and exiting medical students from four UK medical schools. *BMC Med Educ.* 2014; 14, 151.
22. Williams C, Cantillon P. A surgical career? The views of junior women doctors. *Medical Educ.* 2001; 34 (8), 602-607.
23. Taylor KS, Lambert TW, Goldacre ML. Career progression and destinations, comparing men and women in the NHS: postal questionnaire survey. *BMJ.* 2009; 33, 1735.
24. Boyle E, Healy D, Hill ADK, O'Connell PRO, Kerin M et al. Career choices of today's medical students: where does surgery rank? *Irish J of Med Sci.* 2013; 182, 337-343.
25. Svirko E, Lambert T, Goldacre MJ. Gender, ethnicity and graduate status, and junior doctors' self-reported preparedness for clinical practice: national questionnaire surveys. *J Roy Soc Med.* 2014;107 (2), 66-74.
26. Smith F, Lambert TW, Goldacre MJ . Demographic characteristics of doctors who intend to follow clinical academic careers: UK national surveys 2014.
27. Brennan N, Corrigan O, Allard J, Arche J., et al. The transition from medical student to junior doctor: today's experiences of Tomorrow's Doctors. *Med Educ.* 2010; 44 (5), 449-458.

- 1  
2  
3 28. Spooner S, Gibson J, Rigby D, Sutton M, Pearson E, Checkland K. Stick or Twist? Career  
4  
5 decision-making during contractual uncertainty for NHS Junior Doctors. *BMJ Open*. 2017;7:  
6  
7 e013756.  
8  
9
- 10 29. Watmough S, Taylor D, Ryland I. Using questionnaires to determine whether medical  
11  
12 graduates' career choice is determined by undergraduate or postgraduate experiences. *Med*  
13  
14 *Teach*. 2007; 29 (8), 830-832.  
15
- 16 30. Cleland JA, Johnston P, Watson V, Krucien, N, Skatun D. (2017). What do UK medical  
17  
18 students value most in their career? A discrete choice experiment. *Med Educ*. 2017;  
19  
20 doi:10.1111/medu.13257.  
21  
22
- 23 31. Ubach C, Scott A, French F, Awramenko M, Needham G. What do hospital consultants value  
24  
25 about their jobs? A discrete choice experiment, *BMJ*. 2003; 326: 1432.  
26  
27
- 28 32. Lachish S, Goldacre MJ, Lambert T. Associations between institutional support, job  
29  
30 enjoyment, and attitudes to work in first-year doctors in the UK: national questionnaire  
31  
32 survey. *BMC Med Educ*. 2016; 16:151.  
33  
34
- 35 33. Lambert TW, Goldacre MJ, Evans J. Views of junior doctors about their work: survey of  
36  
37 qualifiers of 1993 and 1996 from United Kingdom medical schools. *Med Educ*. 2000; 34, 348-  
38  
39 354.  
40  
41
- 42 34. Sivey P, Scott A, Witt J, Joyce C, Humphreys J. Junior doctors' preferences for specialty  
43  
44 choice. *J Health Economics*. 2012; 31 (6), 813-823.  
45  
46
- 47 35. Sivey P, Scott A, Witt J, Joyce C, Humphreys J. Why Junior Doctors Don't Want to Become  
48  
49 General Practitioners: A Discrete Choice Experiment from the MAYBEI Longitudinal study of  
50  
51 Doctors. Melbourne Institute Working Paper. 2010; 17/10.  
52  
53  
54  
55  
56  
57  
58  
59  
60

- 1  
2  
3 36. Scott A, Witt J, Humphreys J, Joyce C, Kalb G, Jeon SH, McGrail M. Getting doctors into the  
4 bush: General Practitioners' preferences for rural location. *J Social Science and Medicine*.  
5 2013; 96, 33-44.  
6  
7  
8  
9  
10 37. Ryan M, Gerard K, Amaya-Amaya M. Using Discrete choice experiments to value health and  
11 Health care, Vol.11. Dordrecht, The Netherlands: Springer 2008.  
12  
13  
14 38. Ryan, M, Gerard K, Currie G. Using Discrete Choice Experiments in Health Economics. In: The  
15 Elgar Companion to Health Economics. Jones, A.M. (ed). Edward Elgar. 2012.  
16  
17  
18  
19 39. Klotjgaard M, Bech M, Sogaard R. Designing a stated choice experiment: The value of a  
20 qualitative process. *J of Choice Model*. 2012;5: 1-18.  
21  
22  
23  
24 40. Ngene 1.1.2 USER MANUAL & REFERENCE GUIDE. The Cutting Edge in Experimental Design.  
25 2014  
26  
27  
28  
29 41. Johnson FR, Lancsar E, Marshall, D, et al. Constructing experimental designs for discrete-  
30 choice experiments: Report of the ISPOR conjoint analysis experimental design good  
31 research practices task force. *Value Health* 2013; 16:3-13.  
32  
33  
34  
35  
36 42. McFadden D. "Conditional Logit Analysis of Qualitative Choice Behavior." In *Frontier in*  
37 *Econometrics*, 105–42. New York: Academic Press. 1974  
38  
39  
40  
41 43. First Year Medical Students Finance Survey. BMA [https://www.bma.org.uk/-](https://www.bma.org.uk/-/media/files/pdfs/working%20for%20change/shaping%20healthcare/firstyearstudentfinance%20report2012and2013.pdf?la=en)  
42 [/media/files/pdfs/working%20for%20change/shaping%20healthcare/firstyearstudentfinanc](https://www.bma.org.uk/-/media/files/pdfs/working%20for%20change/shaping%20healthcare/firstyearstudentfinance%20report2012and2013.pdf?la=en)  
43 [ereport2012and2013.pdf?la=en](https://www.bma.org.uk/-/media/files/pdfs/working%20for%20change/shaping%20healthcare/firstyearstudentfinance%20report2012and2013.pdf?la=en). (Accessed 8th of March 2016).  
44  
45  
46  
47  
48 44. Grayson MS, Newton DA, Thompson LF. Payback time: the associations of debt and income  
49 with medical student career choice. *Med Educ*. 2012; 46, 983-991.  
50  
51  
52  
53 45. Yvette P, Ben-Shlomo Y. Older doctors and progression through specialty training in the UK:  
54 a cohort analysis of General Medical Council data. *BMJ Open*. 2015; 5:e005658.  
55  
56  
57  
58  
59  
60

- 1  
2  
3 46. Madden L, Mathias BD, Madden TM. In good company. The impact of perceived  
4 organizational support and positive relationships at work on turnover intentions. J  
5 Management Research Review. 2015;38 (3).  
6  
7  
8  
9  
10 47. Lunenburg FC. Self-Efficacy in the Workplace: Implications for Motivation and Performance.  
11 Inter J of Management, Business, and Administration. 2011; 14,1.  
12  
13  
14 48. Chou P. The Effects of Workplace Social Support on Employee's Subjective Well-being. Euro J  
15 of Business and Management. 2015; 7 (6).  
16  
17  
18  
19 49. Bandura A. Cultivate self-efficacy for personal and organizational effectiveness. Oxford:  
20 Blackwell. 2000  
21  
22  
23  
24 50. Judge TA, Erez A, Bono JE, Thoresen C J. "Are Measures of Self-Esteem, Neuroticism, Locus of  
25 Control, and Generalized Self-Efficacy Indicators of a Common Core Construct?", J  
26 Personality and Social Psychology. 2002; 83(3), 693-710.  
27  
28  
29  
30  
31 51. The GMC. Adapting for the future: a plan for improving the flexibility of UK postgraduate  
32 medical training.  
33  
34  
35 [https://www.gmcuk.org/Adapting\\_for\\_the\\_future\\_\\_\\_a\\_plan\\_for\\_improving\\_the\\_flexibility\\_](https://www.gmcuk.org/Adapting_for_the_future___a_plan_for_improving_the_flexibility_of_UK_postgraduate_medical_training_FINAL.pdf_69842348.pdf)  
36 [of\\_UK\\_postgraduate\\_medical\\_training\\_FINAL.pdf\\_69842348.pdf](https://www.gmcuk.org/Adapting_for_the_future___a_plan_for_improving_the_flexibility_of_UK_postgraduate_medical_training_FINAL.pdf_69842348.pdf) (Accessed 25th of  
37  
38  
39  
40  
41  
42  
43  
44  
45  
46  
47  
48  
49  
50  
51  
52  
53  
54  
55  
56  
57  
58  
59  
60

1  
2  
3  
4  
5  
6  
7  
8  
9  
10  
11  
12  
13  
14  
15  
16  
17  
18  
19  
20  
21  
22  
23  
24  
25  
26  
27  
28  
29  
30  
31  
32  
33  
34  
35  
36  
37  
38  
39  
40  
41  
42  
43  
44  
45  
46  
47  
48  
49  
50  
51  
52  
53  
54  
55  
56  
57  
58  
59  
60

54. Eisenberger R, Stinglhamber F, Vandenberghe C, Sucharski IL, Rhoades L. Perceived Supervisor Support: Contributions to Perceived Organizational Support and Employee Retention. *Journal of Applied Psychology*. 2002; 87, 3, 565–573.

For peer review only



**Table 1. Characteristics of training positions and the range of possible levels presented within the choice scenarios.**

| Characteristics                              | Description                                                                                                                                                                                   | Possible Levels                                                                                           |
|----------------------------------------------|-----------------------------------------------------------------------------------------------------------------------------------------------------------------------------------------------|-----------------------------------------------------------------------------------------------------------|
| Geographical Locality                        | This refers to the geographical location of the training position including amenities on offer, and the proximity to your family and friends, and/or spouse/partner employment opportunities. | Desirable Location<br>Undesirable Location                                                                |
| Familiarity With Specialty                   | This refers to how familiar you are with the specialty, whether you have rotated around it previously or have knowledge or experience of it.                                                  | Unfamiliar<br>Quite familiar<br>Very familiar                                                             |
| Culture of Working and Learning Environment. | This refers to perceiving that you are a valued and respected member of staff whose training and learning needs are supported.                                                                | Supportive Culture<br>Unsupportive Culture                                                                |
| Potential Earnings                           | This refers to how your potential earnings compare against average career earnings in your chosen specialty after completing training.                                                        | Average Earnings<br>5% above average earnings<br>10% above average earnings<br>20% above average earnings |
| Working Conditions                           | This refers to working conditions, such as rotas and shift patterns, amount of on call, time off and staffing levels.                                                                         | Excellent Conditions<br>Good Conditions<br>Poor Conditions                                                |
| Opportunities for Professional Development   | This refers to opportunities to undertake academic research, teaching, and training throughout your training programme and career.                                                            | Excellent opportunities<br>Average opportunities<br>Poor opportunities                                    |

Table 2. Results of the multinomial logit (MNL) model

| Job characteristic            | MLE (SE)          | WTP (95% Confidence interval) |
|-------------------------------|-------------------|-------------------------------|
| <b>1. Model parameters</b>    |                   |                               |
| Constant                      | 0.109 (0.035)**   |                               |
| Location: Desirable           | 1.200 (0.0402)*** | -45.75 [-56.1; -35.42]        |
| Working Culture: Supportive   | 1.050 (0.0432)*** | -40.0 [-49.1; -31.0]          |
| Familiarity: Quite familiar   | 0.389 (0.052)***  | -14.83 [-18.56; -11.09]       |
| Familiarity: Very Familiar    | 0.489 (0.059)***  | -18.6 [-24.61; -12.64]        |
| Working conditions: Good      | 0.762 (0.055)***  | -29.02 [-36.23; -21.81]       |
| Working conditions: Excellent | 1.011 (0.059)***  | -38.54. [-46.9; -30.2]        |
| PDP: Average                  | 0.336 (0.044)***  | -12.8 [-16.44; -9.22]         |
| PDP: Excellent                | 0.813 (0.054)***  | -31.0 [-38.72; -23.26]        |
| Potential Earnings            | 0.026 (0.003)***  |                               |
| <b>2. Model statistics</b>    |                   |                               |
| # Respondents                 | 671               |                               |
| # Observations                | 15,964            |                               |
| # Parameters                  | 10                |                               |
| Log-likelihood                | -3,676.4          |                               |

MLE: Maximum Likelihood Estimates; SE: Standard Errors; P: P-value significance (\*\*P < 0.001; \*\* P < 0.01, \*P < 0.05; WTP: Willingness-to-pay/accept estimates as % of earnings)

Table 3. Main and interaction effects.

|                                |                            | $\beta$ | SE    | P   | MLE: Maximum Likelihood Estimate; SE: Standard Error; P-value significance (***) P < 0.001; ** P < 0.01; * P < 0.05; WTP: Willingness to pay/accept estimate as % of earnings (Ratio of estimated coefficient of attribute of interest with earnings coefficient) |
|--------------------------------|----------------------------|---------|-------|-----|-------------------------------------------------------------------------------------------------------------------------------------------------------------------------------------------------------------------------------------------------------------------|
| <b>Main effects</b>            |                            |         |       |     |                                                                                                                                                                                                                                                                   |
| Constant                       | -                          | 0.114   | .035  | **  |                                                                                                                                                                                                                                                                   |
| Location (Desirable)           | -                          | 1.40    | .075  | *** |                                                                                                                                                                                                                                                                   |
| Working Culture (Supportive)   | -                          | 1.271   | .0069 | *** |                                                                                                                                                                                                                                                                   |
| Familiar (Quite)               | -                          | 0.293   | .071  | *** |                                                                                                                                                                                                                                                                   |
| Familiarity (Very)             | -                          | 0.472   | .076  | *** |                                                                                                                                                                                                                                                                   |
| Working Conditions (Good)      | -                          | 0.840   | 0.082 | *** |                                                                                                                                                                                                                                                                   |
| Working Conditions (Excellent) | -                          | 1.162   | 0.083 | *** |                                                                                                                                                                                                                                                                   |
| PDP (Average)                  | -                          | 0.361   | 0.050 | *** |                                                                                                                                                                                                                                                                   |
| PDP (Excellent)                | -                          | 0.870   | 0.061 | *** |                                                                                                                                                                                                                                                                   |
| Potential Earnings             | -                          | 0.026   | 0.003 | *** |                                                                                                                                                                                                                                                                   |
| <b>2. Interaction effects</b>  |                            |         |       |     |                                                                                                                                                                                                                                                                   |
| Location (Desirable)           | Male                       | -0.374  | 0.059 | *** |                                                                                                                                                                                                                                                                   |
| Working Culture (Supportive)   | Male                       | -0.20   | .060  | **  |                                                                                                                                                                                                                                                                   |
| Location (Desirable)           | Graduate Entry (Yes)       | -0.162  | 0.075 | *   |                                                                                                                                                                                                                                                                   |
| Working Culture (Supportive)   | Graduate Entry (Yes)       | -0.168  | .0761 | *   |                                                                                                                                                                                                                                                                   |
| PDP (Average)                  | Graduate Entry (Yes)       | -0.084  | .094  |     |                                                                                                                                                                                                                                                                   |
| PDP (Excellent)                | Graduate Entry (Yes)       | -0.224  | .106  | *   |                                                                                                                                                                                                                                                                   |
| Familiarity (Quite)            | Training Application (Yes) | 0.175   | 0.084 | *   |                                                                                                                                                                                                                                                                   |
| Familiarity (Very)             | Training Application (Yes) | 0.029   | 0.096 |     |                                                                                                                                                                                                                                                                   |
| Working Culture (Supportive)   | Training Application (Yes) | -0.172  | 0.070 | *   |                                                                                                                                                                                                                                                                   |
| Working Conditions (Good)      | Training Application (Yes) | -0.120  | .0986 |     |                                                                                                                                                                                                                                                                   |
| Working Conditions (Excellent) | Training Application (Yes) | -0.240  | .0970 | *   |                                                                                                                                                                                                                                                                   |
| Location (desirable)           | Home Country (World)       | -.255   | .098  | **  |                                                                                                                                                                                                                                                                   |
| <b>3. Model statistics</b>     |                            |         |       |     |                                                                                                                                                                                                                                                                   |
| # Respondents                  | 662                        |         |       |     |                                                                                                                                                                                                                                                                   |
| # Observations                 | 15,868                     |         |       |     |                                                                                                                                                                                                                                                                   |
| # Parameters                   | 22                         |         |       |     |                                                                                                                                                                                                                                                                   |
| Model log-likelihood           | - 3,613.1                  |         |       |     |                                                                                                                                                                                                                                                                   |

1  
2  
3  
4  
5 Figure Legends:  
6

7 Title: Characteristics of training positions and main and interaction effects based upon the  
8 multinomial logit model.  
9

10 Table 1: Characteristics of training positions and the possible levels presented within the  
11 choice scenarios.  
12

13  
14 Table 2: Main Effects of the multinomial logit (MNL) model, (for all participants).  
15

16 Table 3: Main and Interaction effects of participant demographic characteristics (Gender,  
17 Graduate Entry, Training Application and Home Country).  
18  
19  
20  
21  
22  
23  
24  
25  
26  
27  
28  
29  
30  
31  
32  
33  
34  
35  
36  
37  
38  
39  
40  
41  
42  
43  
44  
45  
46  
47  
48  
49  
50  
51  
52  
53  
54  
55  
56  
57  
58  
59  
60

1  
2  
3  
4  
5  
6  
7  
8  
9  
10  
11  
12  
13  
14  
15  
16  
17  
18  
19  
20  
21  
22  
23  
24  
25  
26  
27  
28  
29  
30  
31  
32  
33  
34  
35  
36  
37  
38  
39  
40  
41  
42  
43  
44  
45  
46  
47  
48  
49  
50  
51  
52  
53  
54  
55  
56  
57  
58  
59  
60

**Figure 1: DCE instructions and an example choice scenario**

In this section of the survey we are interested in the factors that have influenced your career decision making in your FY2 year and what characteristics are the most important when making a decision on whether to apply for specialty training, core training or GP training programmes. This section of the survey will ask you a series of choices on what post FY2 training place you would prefer based on characteristics of training places.

Now you will be given a series of 13 choices to make that are all slightly different. For each choice you will be asked two separate questions. One will be to select which option you **prefer** between the 2 training positions on offer. You may not like either post but we would like you to state which one you think is better!

**There are no right or wrong answers to these questions, we are just interested in your opinion!**

| Choice 1 of 13: Which position would you prefer?                      |                          |                          |
|-----------------------------------------------------------------------|--------------------------|--------------------------|
|                                                                       | Position "A"             | Position "B"             |
| Geographical Location                                                 | Undesirable Location     | Desirable Location       |
| Familiarity with specialty                                            | Quite Familiar           | Unfamiliar               |
| Culture of working and Learning Environment.                          | Unsupportive Culture     | Supportive Culture       |
| Potential Earnings                                                    | 10% Above Average        | 20% Above Average        |
| Working Conditions                                                    | Excellent Conditions     | Poor Conditions          |
| Opportunities for Professional Development                            | Average Opportunities    | Poor Opportunities       |
| <b>Which position would you <u>prefer</u>?</b><br>Please tick one box | <input type="checkbox"/> | <input type="checkbox"/> |

210x297mm (300 x 300 DPI)
